# Supplementary material for: Drug Release Kinetics of DOX-Loaded Graphene-Based Nanocarriers for Ovarian and Breast Cancer Therapeutics
Source: MDPI journal article supplement (doi:10.3390/app112311151), 2021-11-24

## **Supporting Information**

### **Drug release kinetics of DOX-loaded graphene-based nanocarriers for ovarian and breast cancer therapeutics**

Department of Mechanical Engineering, University College London, London WC1E 7JE, UK;

Katherine.taylor.20@ucl.ac.uk

<sup>2</sup> UCL Cancer Institute, University College London, London WC1E 6DD, UK;

T.tabish@imperial.ac.uk

<sup>3</sup> Department of Materials and London Centre for Nanotechnology, Imperial College London, London SW7 2AZ, UK

<sup>4</sup> Joint Department of Biomedical Engineering, University of North Carolina and North Carolina State

University, Raleigh, NC27695-7907, USA

\* Correspondence: Roger\_narayan@unc.edu or roger\_narayan@unc.edu

#### **List of supporting information tables and figures**

**Table S1** – Table displaying the title, first author, journal, publication year and DOI of the seventeen publications analysed.

**Table S2** - Table displaying the nanocarrier characteristics of each of the seventeen publications analysed.

**Table S3** - Table displaying the payload characteristics and drug loading information, including both the drug loading capacity and drug loading/encapsulation efficiency, for the seventeen publications.

**Table S4** - A table displaying the experimental conditions under which the drug release was recorded. Information on the biological assays undertaken by each publication is also recorded.

**Table S5** - This table displays the numerical results of the statistical analysis. The  $R^2$  value,  $Sy.x$  value, gradient, and  $P$  value were recorded for each of the four kinetic models.

**Figure S1-S17** - The linear regression graphs of the zero-order, first-order, Higuchi, and Weibull models for each of the seventeen publications analysed.

**Table S1.** Table displaying the title, first author, journal, publication year and DOI for the seventeen publications analysed.

| Paper No. | Title                                                                                                                                                          | First author     | Journal                                            | Publication Year | Digital Object Identifier (DOI)                                                                     |
|-----------|----------------------------------------------------------------------------------------------------------------------------------------------------------------|------------------|----------------------------------------------------|------------------|-----------------------------------------------------------------------------------------------------|
| 1         | Hyaluronic acid and Arg-Gly-Asp peptide modified Graphene oxide with dual receptor-targeting function for cancer therapy                                       | Yufeng Guo       | Journal of Biomaterials Applications               | 2017             | <a href="https://doi.org/10.1177/0885328217712110">doi.org/10.1177/0885328217712110</a>             |
| 2         | Mixed surfactant modified graphene oxide nanocarriers for DOX delivery to cisplatin-resistant human ovarian carcinoma cells                                    | Qian Zhang       | RSC Advances                                       | 2016             | <a href="https://doi.org/10.1039/C6RA17609G">doi.org/10.1039/C6RA17609G</a>                         |
| 3         | Smart pH-Responsive Nanocarriers Based on Nano-Graphene Oxide for Combined Chemo- and Photothermal Therapy Overcoming Drug Resistance                          | Liangzhu Feng    | Advanced Healthcare Materials                      | 2014             | <a href="https://doi.org/10.1002/adhm.201300549">doi.org/10.1002/adhm.201300549</a>                 |
| 4         | Hypericin-functionalised graphene oxide for enhanced mitochondria-targeting and synergistic anticancer effect                                                  | Chao Han         | Acta Biomaterialia                                 | 2018             | <a href="https://doi.org/10.1016/j.actbio.2018.07.018">doi.org/10.1016/j.actbio.2018.07.018</a>     |
| 5         | Fe <sub>3</sub> O <sub>4</sub> @PEG-coated dendrimer modified graphene oxide nanocomposite as a pH-sensitive drug carrier for targeted delivery of doxorubicin | Soheyla Karimi   | Journal of Alloys and Compounds                    | 2021             | <a href="https://doi.org/10.1016/j.jallcom.2021.160426">doi.org/10.1016/j.jallcom.2021.160426</a>   |
| 6         | Chelating ZnO-dopamine on the surface of graphene oxide and its application as pH-responsive and antibacterial nanohybrid delivery agent for doxorubicin       | Nastaran Alipour | Materials Science and Engineering: C               | 2020             | <a href="https://doi.org/10.1016/j.msec.2019.110459">doi.org/10.1016/j.msec.2019.110459</a>         |
| 7         | Development of a graphene oxide-poly lactide nanocomposite as a Smart Drug Delivery System                                                                     | Aliyeh Ghamkhari | International Journal of Biological Macromolecules | 2021             | <a href="https://doi.org/10.1016/j.ijbiomac.2020.12.084">doi.org/10.1016/j.ijbiomac.2020.12.084</a> |
| 8         | Folic acid-grafted bovine serum albumin decorated graphene oxide: An efficient drug carrier for targeted cancer therapy                                        | Naxin Ma         | Journal of Colloid and Interface Science           | 2017             | <a href="https://doi.org/10.1016/j.jcis.2016.11.097">doi.org/10.1016/j.jcis.2016.11.097</a>         |
| 9         | Self-Assembled Graphene-Dextran Nanohybrid for Killing Drug-Resistant Cancer Cells                                                                             | Rong Jin         | ACS Applied Materials & Interfaces                 | 2013             | <a href="https://doi.org/10.1021/am401523y">doi.org/10.1021/am401523y</a>                           |

**Table S1 continued**

|    |                                                                                                                                                        |               |                                          |      |                                                                                                             |
|----|--------------------------------------------------------------------------------------------------------------------------------------------------------|---------------|------------------------------------------|------|-------------------------------------------------------------------------------------------------------------|
| 10 | High-Efficiency Loading and Controlled Release of Doxorubicin Hydrochloride on Graphene Oxide                                                          | Xiaoying Yang | The Journal of Physical Chemistry C      | 2008 | <a href="https://doi.org/10.1021/jp806751k">doi.org/10.1021/jp806751k</a>                                   |
| 11 | Remote Controlled drug release from multi-functional Fe <sub>3</sub> O <sub>4</sub> /GO/Chitosan microspheres fabricated by an electrospray method     | Sheng Li      | Colloids and Surfaces B: Biointerfaces   | 2017 | <a href="https://doi.org/10.1016/j.colsurfb.2016.12.029">doi.org/10.1016/j.colsurfb.2016.12.029</a>         |
| 12 | Engineering of a novel pluronic F127/graphene nanohybrid for pH responsive drug delivery                                                               | Haiqing Hu    | Journal of Biomedical Materials Research | 2011 | <a href="https://doi.org/10.1002/jbm.a.33252">doi.org/10.1002/jbm.a.33252</a>                               |
| 13 | Sonochemically synthesized blue fluorescent functionalized graphene oxide as a drug delivery system                                                    | Hamed Hashemi | Ultrasonics Sonochemistry                | 2018 | <a href="https://doi.org/10.1016/j.ultsonch.2017.11.010">doi.org/10.1016/j.ultsonch.2017.11.010</a>         |
| 14 | A de novo theranostic nanomedicine composed of PEGylated graphene oxide and gold nanoparticles for cancer therapy                                      | Hadi Samadian | Journal of Materials Research            | 2020 | <a href="https://doi.org/10.1557/jmr.2020.3">doi.org/10.1557/jmr.2020.3</a>                                 |
| 15 | Graphene oxide used as a carrier for Adriamycin can reverse drug resistance in breast cancer cells                                                     | Jing Wu       | Nanotechnology                           | 2012 | DOI:10.1088/0957-4484/23/35/355101                                                                          |
| 16 | A tumor-targeting near-infrared laser-triggered drug delivery system based on GO@Ag nanoparticles for chemo- and photothermal therapy and X-ray        | Jinjin Shi    | Biomaterials                             | 2014 | <a href="https://doi.org/10.1016/j.biomaterials.2014.03.042">doi.org/10.1016/j.biomaterials.2014.03.042</a> |
| 17 | Folic acid-functionalized graphene oxide nanosheets via plasma etching as a platform to combine NIR anticancer phototherapy and targeted drug delivery | Nicolò Mauro  | Materials Science and Engineering: C     | 2020 | <a href="https://doi.org/10.1016/j.msec.2019.110201">doi.org/10.1016/j.msec.2019.110201</a>                 |

**Table S2.** Table displaying the nanocarrier characteristics of each of the seventeen publications analysed

| No. | Composition of Nanocarrier                                                                                                                                               | Method of fabrication                                                                                                                                                            | Therapeutic Application | Size of particles (nm) | Size of nanostructure (nm)        |                                                        | Ratio of components                                | Shape/ Morphology                                      | Zeta Potential (mV)                                            | Ref. |
|-----|--------------------------------------------------------------------------------------------------------------------------------------------------------------------------|----------------------------------------------------------------------------------------------------------------------------------------------------------------------------------|-------------------------|------------------------|-----------------------------------|--------------------------------------------------------|----------------------------------------------------|--------------------------------------------------------|----------------------------------------------------------------|------|
|     |                                                                                                                                                                          |                                                                                                                                                                                  |                         |                        | Size/thickness /height of GO (nm) | Size/thickness /height of functionalised graphene (nm) |                                                    |                                                        |                                                                |      |
| 1   | GO modified with hyaluronic acid and Arg-gly-asp peptide (GO-HA-RGD)                                                                                                     | GO synthesised by modified Hummer's method was then functionalised with HA through the EDC-mediated amidation reaction, followed by RGD through a Michael-type addition reaction | Cancer                  | 70 – 490               | Height = 1.2                      | Height = 13                                            | 43.19 wt% (GO)<br>49.34 wt% (HA)<br>7.47 wt% (RGD) | Almost circular with a course surface                  | NR                                                             | 43   |
| 2   | GO functionalised with hydroxymethyl cellulose and polyanionic cellulose (GO-PAC/HEC)                                                                                    | GO synthesised via a modified Hummer method and then stirred with PAC and HEC.                                                                                                   | Cancer                  | 30-200                 | Height = 1.592                    | Height = $\geq 3.084$ (GO-PAC/HEC)                     | 47.1 wt% (GO)<br>52.9 wt% (PAC/HEC)                | Mottlings and floccules on surface when functionalised | ~ -10 to -30 dependent on GO:DOX ratio                         | 63   |
| 3   | Nanoscale GO conjugated with PEG and poly(allylamine hydrochloride) which is then modified with 2,3-dimethyl maleic anhydride (NGO-PEG-DA) or succinic acid (NGO-PEG-SA) | GO prepared using modified Hummers method, then functionalised through coating with PEG and PAH. The PAH is then modified with either DA or SA in alkaline conditions.           | Cancer                  | NR                     | NR                                | ~70                                                    | ~25.3% PEG content (other components NR)           | NR                                                     | NGO-PEG-SA = $-37.1 \pm 1.05$<br>NGO-PEG-DA = $-34.4 \pm 0.19$ | 64   |

NR = Not Recorded, NA = Not Applicable, No. = publication/paper number, Ref. = Reference

Table S2 continued.

|   |                                                                                                                                                                              |                                                                                                                                                                                 |        |                                         |                |                         |    |                                                                                                                             |                                                             |    |
|---|------------------------------------------------------------------------------------------------------------------------------------------------------------------------------|---------------------------------------------------------------------------------------------------------------------------------------------------------------------------------|--------|-----------------------------------------|----------------|-------------------------|----|-----------------------------------------------------------------------------------------------------------------------------|-------------------------------------------------------------|----|
| 4 | Functionalised GO modified with mitochondria-targeting hypericin (GO-PEG-SS-HY)                                                                                              | GO-PEG fabricated by carbodiimide catalysed amide formation and further functionalization with SS and HY followed sequential covalent conjugation reaction methods.             | Cancer | NR                                      | Height = 1     | Width = 200, height = 8 | NR | NR                                                                                                                          | NR                                                          | 65 |
| 5 | GO functionalised with triazine dendrimer and modified with Fe <sub>3</sub> O <sub>4</sub> functionalised by polyethylene glycol (GO-TD-Fe <sub>3</sub> O <sub>4</sub> @PEG) | GO synthesised by a modified Hummer's method. GO-DT then fabricated by the divergent method and Fe <sub>3</sub> O <sub>4</sub> nanoparticles were then attached to its surface. | Cancer | Fe <sub>3</sub> O <sub>4</sub> NPs = 30 | Thickness = 41 | Thickness = 144.21      | NR | Spherical, rough surface, regular spherical Fe <sub>3</sub> O <sub>4</sub> @PEG nanoparticles dispersed on graphene surface | GO = -28.4, GO-TD-Fe <sub>3</sub> O <sub>4</sub> @PEG = -39 | 66 |
| 6 | Chelating ZnO-dopamine on the surface of GO. (Zn-d-rGO)                                                                                                                      | ZnO nanoparticles covalently chelated with catechol end groups in dopamine through In situ modification and then conjugated to surface of GO                                    | Cancer | Zn-d 3 average size = 23                | Thickness = 41 | Thickness = 28-38       | NR | Curtain and planner structure of GO seen throughout nanocarrier Mesoporous structure                                        | Zn-d 3 = + 17.9<br>Zn-d 3 r-GO = NR                         | 67 |

Table S2 continued.

|    |                                                                                                                                                                         |                                                                                                                                                                      |               |                                |                                                     |                                                    |                                   |                                                    |                                                                              |    |
|----|-------------------------------------------------------------------------------------------------------------------------------------------------------------------------|----------------------------------------------------------------------------------------------------------------------------------------------------------------------|---------------|--------------------------------|-----------------------------------------------------|----------------------------------------------------|-----------------------------------|----------------------------------------------------|------------------------------------------------------------------------------|----|
| 7  | GO/poly(2-hydroxyethylmet hacrylate)-g-poly(lactide)-b-polyethyleneglyco l-b-poly(2-hydroxyethylmet hacrylate)-g-poly(lactide) (GO)/(PHEMA-g-PLA)-b-PEG-b-(PHEMA-g-PLA) | Synthesised via reversible addition fragmentation chain reaction and ring open polymerisation                                                                        | Cancer        | Average diameter $51.13 \pm 5$ | Size = 28.44                                        | Size = 125                                         | NR                                | Folded and wrinkled                                | -22.8                                                                        | 68 |
| 8  | GO decorated with folic acid grafted bovine serum albumin (FA-BSA/GO)                                                                                                   | Fabricated by the physical adsorption of FA-BSA on the graphene oxide                                                                                                | Cancer        | NA                             | Height = $1.29 \pm 0.52$<br>Size = $114.9 \pm 2.14$ | Height = $2.29 \pm 0.32$<br>Size = $73.7 \pm 1.30$ | 1:1 to 4:1 ratio of DOX:FA-BSA/GO | Lamellar structure with no appreciable aggregation | ~-19 to -20 at pH 7.4                                                        | 69 |
| 9  | GO functionalised with dextran and hematin (NGO-HDex)                                                                                                                   | NGO synthesised through a modified Hummers method and the composite was then fabricated by the one pot reduction of NGO in the presence of hematin-dextran conjugate | Cancer        | NA                             | Size = 178                                          | Size = 220-240<br>Thickness = 3.6-4.3              | HDex wt% 42-78                    | NR                                                 | NGO = -28.7<br>NGO-HDex = -23.0 to -11.7<br>(depending on ratio of NGO-HDex) | 70 |
| 10 | Graphene Oxide (GO)                                                                                                                                                     | Fabricated by a modified Hummer's method                                                                                                                             | Drug delivery | NA                             | Height = 0.8-1.0                                    | Height = 0.8-1.0                                   | NA                                | Rough Surface compared to pristine graphene        | NR                                                                           | 71 |

NR = Not Recorded, NA = Not Applicable, No. = publication/paper number, Ref. = Reference

**Table S2 continued.**

|    |                                                                                                                                                      |                                                                                                                                                                                                   |               |            |                                        |                             |                         |                                                                                 |    |    |
|----|------------------------------------------------------------------------------------------------------------------------------------------------------|---------------------------------------------------------------------------------------------------------------------------------------------------------------------------------------------------|---------------|------------|----------------------------------------|-----------------------------|-------------------------|---------------------------------------------------------------------------------|----|----|
| 11 | Fe <sub>3</sub> O <sub>4</sub> nanoparticles and GO nanosheets incorporated into chitosan microspheres (Fe <sub>3</sub> O <sub>4</sub> /GO/Chitosan) | GO prepared by Marciano's method. Nanohybrid fabricated by stirring of Fe <sub>3</sub> O <sub>4</sub> and GO in chitosan solution                                                                 | Drug delivery | NR         | NR                                     | NR                          | Multiple conditions     | Compact surface and spherical morphology                                        | NR | 72 |
| 12 | Graphene nanosheet functionalised with Pluronic F127 (PF127/GN)                                                                                      | Simultaneous reduction of GO and functionalization with PF127                                                                                                                                     | Cancer        | NA         | Average thickness = 0.876<br>Size = 80 | Average thickness = 9.646   | Graphene = 15 wt%       | NR                                                                              | NR | 73 |
| 13 | GO modified with 1-(10-bromoanthracene-9-yl)-1H-imidazole-4,5-dicarboxylic acid (GO-A-Im)                                                            | An ultrasound assisted copper catalysed cross coupling reaction used to synthesise A-Im. GO synthesised using modified Hummer's method then functionalised with A-Im                              | Cancer        | NA         | Size = 50                              | Size = 75                   | NR                      | Small round pieces distributed on GO flakes                                     | NR | 74 |
| 14 | A PEG and FA conjugated GO decorated with gold nanoparticles (GO-PEG-FA/GNP)                                                                         | GO was synthesised through oxidising graphite powder and then functionalised with PEG and FA. GNPs were synthesised through a citrate mediated reduction and decorated onto the functionalised GO | Cancer        | GNPs = 8±2 | Hydrodynamic diameter = 735            | Hydrodynamic diameter = 128 | Content of GNPs ~ 8 wt% | Crumpled, wrinkled porous structure of GO, GNPs had uniform spherical structure | NR | 75 |

NR = Not Recorded, NA = Not Applicable, No. = publication/paper number, Ref. = Reference

**Table S2 continued.**

|    |                                                                                             |                                                                                                                                               |        |              |                                 |                             |    |                                                  |                            |    |
|----|---------------------------------------------------------------------------------------------|-----------------------------------------------------------------------------------------------------------------------------------------------|--------|--------------|---------------------------------|-----------------------------|----|--------------------------------------------------|----------------------------|----|
| 15 | Graphene oxide (GO)                                                                         | GO processed by sonication to obtain small-size graphene nanosheets                                                                           | Cancer | NA           | Size = 100, thickness = 0.8-1.5 | Thickness ~ 2 nm            | NA | Single or double layered graphene structure      | NR                         | 76 |
| 16 | GO decorated with Ag nanoparticles and functionalised with DSPE-PEG2000-NGR (GO@Ag-DOX-NGR) | Ag nanoparticles deposited onto GO through a hydrothermal reaction.                                                                           | Cancer | Ag NPs= 5-15 | NR                              | NR                          | NR | Ag nanoparticles deposited on GO sheets          | -29.1 ± 1.9                | 77 |
| 17 | Folic acid-functionalised PEGylated GO (GO-PEG-Fol)                                         | A nano-GO sheet was fabricated through non-equilibrium plasma etching of GO and then functionalised through amide coupling and cycloaddition. | Cancer | NA           | Width = 30-40<br>Thickness = 1  | Size = 35, Thickness = 1.25 | NR | Unilamellar GO sheets, roughness from PEG chains | -28 (GO-PEG-Fol/Doxo = -5) | 78 |

**Table S3.** Table displaying the payload characteristics and drug loading information, including both the drug loading capacity and drug loading/encapsulation efficiency, for the seventeen publications.

|     | Payload Characteristics |                                                                          |         | Drug Loading                                                |                                                            |      |
|-----|-------------------------|--------------------------------------------------------------------------|---------|-------------------------------------------------------------|------------------------------------------------------------|------|
| No. | Type of Payload         | Loading Method                                                           | Payload | Drug loading capacity (%)                                   | Drug loading/encapsulation efficiency (%)                  | Ref. |
| 1   | Small molecule          | $\pi$ - $\pi$ stacking and hydrogen bonding                              | DOX     | NR                                                          | 72.90                                                      | 43   |
| 2   | Small molecule          | $\pi$ - $\pi$ stacking and hydrogen bonding                              | DOX     | 216% (1:4 GO:DOX)<br>152% (1:2 GO:DOX)<br>49% (1:05 GO:DOX) | 54% (1:4 GO:DOX)<br>76% (1:2 GO:DOX)<br>98% (1:0.5 GO:DOX) | 63   |
| 3   | Small molecule          | $\pi$ - $\pi$ stacking and hydrogen bonding                              | DOX     | NR                                                          | ~50                                                        | 64   |
| 4   | Small molecule          | $\pi$ - $\pi$ stacking and hydrogen bonding                              | DOX     | 80                                                          | NR                                                         | 65   |
| 5   | Small molecule          | $\pi$ - $\pi$ stacking and hydrogen bonding and hydrophobic interactions | DOX     | 9.26                                                        | 92.6                                                       | 66   |
| 6   | Small molecule          | $\pi$ - $\pi$ stacking and hydrogen bonding                              | DOX     | Zn-d 3-rGO = 39.9%<br>GO = 39.6 %                           | Zn-d 3-rGO = 99.7 %<br>GO = 99.3%                          | 67   |
| 7   | Small molecule          | $\pi$ - $\pi$ stacking and hydrogen bonding                              | DOX     | NR                                                          | 82 $\pm$ 1.12                                              | 68   |
| 8   | Small molecule          | $\pi$ - $\pi$ stacking and hydrogen bonding                              | DOX     | 30.43                                                       | NR                                                         | 69   |
| 9   | Small molecule          | $\pi$ - $\pi$ stacking and hydrogen bonding                              | DOX     | Maximum = 346 %                                             | 96.5 %                                                     | 70   |
| 10  | Small molecule          | $\pi$ - $\pi$ stacking and hydrogen bonding                              | DOX     | NR                                                          | 91                                                         | 71   |
| 11  | Small molecule          | $\pi$ - $\pi$ stacking and hydrogen bonding                              | DOX     | Maximum = 18.69 $\pm$ 5.6                                   | Maximum = 80.9 $\pm$ 8.1                                   | 72   |
| 12  | Small molecule          | $\pi$ - $\pi$ stacking and hydrogen bonding                              | DOX     | 289                                                         | NR                                                         | 73   |
| 13  | Small molecule          | $\pi$ - $\pi$ stacking and hydrogen bonding                              | DOX     | NR                                                          | 91                                                         | 74   |

NR = Not Recorded, NA = Not Applicable, No. = publication/paper number, Ref. = Reference

**Table S3 continued.**

|    |                |                                                                       |           |                                          |                                          |    |
|----|----------------|-----------------------------------------------------------------------|-----------|------------------------------------------|------------------------------------------|----|
| 14 | Small molecule | $\pi$ - $\pi$ stacking and hydrogen bonding                           | DOX       | GO-PEG-FA-SH = 67<br>GO-PEG-FA/GNPs = 76 | GO-PEG-FA-SH = 72<br>GO-PEG-FA/GNPs = 84 | 75 |
| 15 | Small molecule | $\pi$ - $\pi$ stacking and hydrogen bonding                           | ADR (DOX) | NR                                       | 93.6                                     | 76 |
| 16 | Small molecule | Ester bond linkage                                                    | DOX       | NR                                       | 82                                       | 77 |
| 17 | Small molecule | $\pi$ - $\pi$ stacking, hydrogen bonding and hydrophobic interactions | DOX       | 33.3                                     | 98.65                                    | 78 |

**Table S4.** A table displaying the experimental conditions under which the drug release was recorded, including the temperature and pH. The maximum cumulative release and the timeframe of the measurement was recorded. Information on the biological assays undertaken by each publication is also recorded.

|     | Drug Release Conditions |               |                   |                | Maximum Cumulative Drug Release |           |           |                                                                                                                                          | Biological Assays  |                             |                                                                                                  |      |
|-----|-------------------------|---------------|-------------------|----------------|---------------------------------|-----------|-----------|------------------------------------------------------------------------------------------------------------------------------------------|--------------------|-----------------------------|--------------------------------------------------------------------------------------------------|------|
| No. | Stimulation method      | pH            | Temp-erature (°C) | Nanocarrier    | Cumulative release (%)          | Condition | Time (hr) | Comments                                                                                                                                 | Pre-clinical study | Model (cell line or animal) | Suggested mechanism of cellular uptake                                                           | Ref. |
| 1   | pH response             | 5.5, 7.4      | 37                | GO-HA-RGD/DOX  | 30.2                            | pH 5.0    | 72        | Sustained release                                                                                                                        | <i>In vitro</i>    | SKOV-3 and HOSEpiC          | Uptake facilitated by the synergistic behaviour of CD44-HA and integrin-RGD mediated endocytosis | 43   |
|     |                         |               |                   |                | 7.6                             | pH 7.4    |           |                                                                                                                                          |                    |                             |                                                                                                  |      |
| 2   | pH response             | 5.0, 7.4      | 37                | GO-PAC/HEC/DOX | 80                              | pH 5.0    | 35        | Fast release up to 12 hours (~69% DOX release)                                                                                           | <i>In vitro</i>    | SKOV3 and SKOV3/DP          | NPs attach to cytomembrane and enter cells through endocytosis                                   | 63   |
|     |                         |               |                   |                | 20                              | pH 7.4    |           |                                                                                                                                          |                    |                             |                                                                                                  |      |
| 3   | pH response             | 5.0, 6.8, 7.4 | 37                | NGO-PEG-DA/DOX | 31.4                            | pH 5.0    | 24        | More rapid release from NGO-PEG-DA/DOX due to the electrostatic repulsion between DOX and DA which is positively charged under acidic pH | <i>In vitro</i>    | MCF-7/WT, MCF-7/ADR         | pH dependent cellular uptake                                                                     | 64   |
|     |                         |               |                   |                | 13.7                            | PH 6.8    |           |                                                                                                                                          |                    |                             |                                                                                                  |      |
|     |                         |               |                   |                | ~6                              | pH 7.4    |           |                                                                                                                                          |                    |                             |                                                                                                  |      |
|     |                         |               |                   | NGO-PEG-SA/DOX | 23                              | pH 5.0    |           |                                                                                                                                          |                    |                             |                                                                                                  |      |
|     |                         |               |                   |                | 10.2                            | PH 6.8    |           |                                                                                                                                          |                    |                             |                                                                                                  |      |
|     |                         |               |                   |                | 5.4                             | pH 7.4    |           |                                                                                                                                          |                    |                             |                                                                                                  |      |

Table S4 continued.

|   |             |                     |    |                                                        |      |        |     |                                                                             |                                  |                                                                |                                        |    |
|---|-------------|---------------------|----|--------------------------------------------------------|------|--------|-----|-----------------------------------------------------------------------------|----------------------------------|----------------------------------------------------------------|----------------------------------------|----|
| 4 | pH response | 5.5,<br>7.4         | 37 | GO-PEG-SS-<br>HY/DOX                                   | 29   | pH 5.5 | 48  | Most rapid<br>release between 4<br>and 24 hours at<br>pH 5.5                | <i>In<br/>vitro/<br/>In vivo</i> | MCF-10A,<br>MDA-MB-<br>231, MCF-<br>7, BALC/c<br>nude<br>mice, | Endocytosis                            | 65 |
|   |             |                     |    |                                                        | 11   | pH 7.4 |     |                                                                             |                                  |                                                                |                                        |    |
| 5 | pH response | 5.0,<br>6.8,<br>7.4 | 37 | GO-TD-<br>Fe <sub>3</sub> O <sub>4</sub> @PEG/D<br>OX  | 97.3 | pH 5.0 | 72  | Sustained release                                                           | <i>In vitro</i>                  | MCF-10A,<br>MCF-7                                              | Endocytosis or<br>diffusion            | 66 |
|   |             |                     |    |                                                        | 69.5 | PH 6.8 |     |                                                                             |                                  |                                                                |                                        |    |
|   |             |                     |    |                                                        | 66.1 | pH 7.4 |     |                                                                             |                                  |                                                                |                                        |    |
| 6 | pH response | 5.4,<br>7.4         | 37 | Zn-d3-rGO/DOX                                          | 78   | pH 5.4 | 312 | Long time frame<br>to measure<br>release                                    | <i>In vitro</i>                  | T47D,<br>MCF-10A                                               | NR                                     | 67 |
|   |             |                     |    |                                                        | 52   | pH 7.4 |     |                                                                             |                                  |                                                                |                                        |    |
| 7 | pH response | 5.4,<br>7.4         | 37 | GO/(PHEMA-g-<br>PLA)-b-PEG-b-<br>(PHEMA-g-<br>PLA)/DOX | 41.2 | pH 5.4 | 72  | Rapid release for<br>10 hours then<br>more sustained to<br>72 hours         | <i>In vitro</i>                  | 4T1                                                            | Energy<br>dependent<br>endocytosis     | 68 |
|   |             |                     |    |                                                        | 24.7 | pH 7.4 |     |                                                                             |                                  |                                                                |                                        |    |
| 8 | pH response | 5.0,<br>7.4         | 37 | FA-<br>BSA/GO/DOX                                      | 70   | pH 5.0 | 192 | Rapid release<br>before 12 hours<br>then more<br>sustained release<br>after | <i>In vitro</i>                  | MCF-7,<br>A549                                                 | FA receptor<br>mediated<br>endocytosis | 69 |
|   |             |                     |    |                                                        | 57   | pH 7.4 |     |                                                                             |                                  |                                                                |                                        |    |
| 9 | pH response | 5.5,<br>7.4         | 37 | NGO-HDex/DOX                                           | 27.3 | pH 5.5 | 144 | Controlled and<br>sustained drug<br>release profile<br>over 144 hours       | <i>In vitro</i>                  | MCF-<br>7/ADR                                                  | Not elucidated to                      | 70 |
|   |             |                     |    |                                                        | 20.6 | pH 7.4 |     |                                                                             |                                  |                                                                |                                        |    |

Table S4 continued.

|    |                    |                      |    |                       |    |            |    |                                                                                                                                                                                              |                 |       |                   |    |
|----|--------------------|----------------------|----|-----------------------|----|------------|----|----------------------------------------------------------------------------------------------------------------------------------------------------------------------------------------------|-----------------|-------|-------------------|----|
| 10 | pH response        | 2.0,<br>7.0,<br>10.0 | NR | GO/DOX                | 71 | PH 2.0     | 30 | Stronger hydrogen bonding under basic than acidic conditions – but both have partial dissociation of hydrogen bonding compared to neutral pH                                                 | NA              | NA    | NA                | 71 |
|    |                    |                      |    |                       | 11 | PH 7.0     |    |                                                                                                                                                                                              |                 |       |                   |    |
|    |                    |                      |    |                       | 25 | PH 10.0    |    |                                                                                                                                                                                              |                 |       |                   |    |
| 11 | NIR and Ultrasound | 7.4                  | 37 | Fe3O4/GO/Chitosan/DOX | 37 | Normal     | 1  | With each pulse of NIR or ultrasound there is a burst release and therefore the release rate jumps                                                                                           | NA              | NA    | NA                | 72 |
|    |                    |                      |    |                       | 46 | NIR        |    |                                                                                                                                                                                              |                 |       |                   |    |
|    |                    |                      |    |                       | 44 | Ultrasound |    |                                                                                                                                                                                              |                 |       |                   |    |
| 12 | pH response        | 5.0,<br>7.0,<br>9.0  | 37 | PF127/GN/DOX          | 56 | pH 5.0     | 90 | Higher DOX release under acidic conditions compared to basic is due to the higher solubility of DOX under acidic conditions<br>Rapid release up to 20 hours then more sustained till maximum | <i>In vitro</i> | MCF-7 | Not elucidated to | 73 |
|    |                    |                      |    |                       | 15 | PH 7.0     |    |                                                                                                                                                                                              |                 |       |                   |    |
|    |                    |                      |    |                       | 25 | PH 9.0     |    |                                                                                                                                                                                              |                 |       |                   |    |

Table S4 continued.

|    |             |                     |        |                    |      |        |     |                                                                                                                                 |                                     |                                                  |                                                                        |    |
|----|-------------|---------------------|--------|--------------------|------|--------|-----|---------------------------------------------------------------------------------------------------------------------------------|-------------------------------------|--------------------------------------------------|------------------------------------------------------------------------|----|
| 13 | pH response | 3.0,<br>5.4,<br>7.4 | NR     | GO-A-Irn/DOX       | 73   | PH 3.4 | 75  | Rapid DOX release after 5 hours and then more continued sustained release to follow. Due to the different types of interactions | <i>In vitro</i><br><i>/In vivo</i>  | T47D, BALB/c mice injected with 4T1 murine cells | NR                                                                     | 74 |
|    |             |                     |        |                    | 70   | PH 5.4 |     |                                                                                                                                 |                                     |                                                  |                                                                        |    |
|    |             |                     |        |                    | 33   | PH 7.4 |     |                                                                                                                                 |                                     |                                                  |                                                                        |    |
| 14 | pH response | 4.0,<br>7.4         | 37     | GO-PEG-FA-SH/DOX   | 38.5 | PH 4.0 | 295 | The DOX-loaded GO-PEG-FA/GNPs have higher cumulative release values                                                             | <i>In vitro</i>                     | MCF-7                                            | NR                                                                     | 75 |
|    |             |                     |        |                    | 21.9 | PH 7.4 |     |                                                                                                                                 |                                     |                                                  |                                                                        |    |
|    |             |                     |        | GO-PEG-FA/GNPs/DOX | 42.8 | PH 4.0 |     |                                                                                                                                 |                                     |                                                  |                                                                        |    |
|    |             |                     |        |                    | 31.3 | PH 7.4 |     |                                                                                                                                 |                                     |                                                  |                                                                        |    |
| 15 | pH response | 5.0,<br>7.2,<br>9.0 | 37±0.2 | GO/ADR             | 16.1 | PH 5.0 | 46  | Acidic and basic conditions both had more rapid DOX release than neutral conditions                                             | <i>In vitro</i>                     | MCF-7, MCF-7/ADR                                 | Both endocytosis-dependent and independent manners (passive diffusion) | 76 |
|    |             |                     |        |                    | 5.3  | PH 7.2 |     |                                                                                                                                 |                                     |                                                  |                                                                        |    |
|    |             |                     |        |                    | 7.4  | PH 9.0 |     |                                                                                                                                 |                                     |                                                  |                                                                        |    |
| 16 | NIR light   | NA                  | NA     | GO@Ag/DOX          | 45.6 | NIR    | 24  | When NIR was present chemical bonding was broken and more DOX released; more also accumulated in the nucleus                    | <i>In vitro</i> /<br><i>In vivo</i> | MCF-7, tumour-bearing mice                       | Endocytosis                                                            | 77 |
|    |             |                     |        |                    | 12.0 | No NIR |     |                                                                                                                                 |                                     |                                                  |                                                                        |    |

NR = Not Recorded, NA = Not Applicable, No. = publication/paper number, Ref. = Reference

Table S4 continued.

|    |             |             |    |                    |     |        |    |                                                                                                                             |                 |                                |                                |    |
|----|-------------|-------------|----|--------------------|-----|--------|----|-----------------------------------------------------------------------------------------------------------------------------|-----------------|--------------------------------|--------------------------------|----|
| 17 | pH response | 5.5,<br>7.4 | 37 | GO-PEG-<br>Fol/DOX | ~22 | PH 5.5 | 48 | Nanocarrier<br>released the drug in<br>a time-dependent<br>manner without the<br>burst effect that is<br>seen with free DOX | <i>In vitro</i> | MCF-7,<br>MDA-MB-<br>231, HDFa | Folate-mediated<br>endocytosis | 78 |
|    |             |             |    |                    | ~11 | PH 7.4 |    |                                                                                                                             |                 |                                |                                |    |

**Table S5.** This table displays the numerical results of the statistical analysis. The  $R^2$  value,  $Sy.x$  value, gradient, and  $P$  value are recorded for each of the four kinetic models, for each nanohybrid under the different conditions recorded by the publications. The results are given to 4 decimal places.

| No. | Nano carrier and Release Condition | Zero Order Model |         |        |           | First Order Model |        |         |           | Higuchi Model |        |         |           | Weibull Model |        |         |           |
|-----|------------------------------------|------------------|---------|--------|-----------|-------------------|--------|---------|-----------|---------------|--------|---------|-----------|---------------|--------|---------|-----------|
|     |                                    | $R^2$            | $Sy.x$  | $K_0$  | $P$ value | $R^2$             | $Sy.x$ | $K_1$   | $P$ value | $R^2$         | $Sy.x$ | $K_H$   | $P$ value | $R^2$         | $Sy.x$ | $\beta$ | $P$ value |
| 1   | GO-HA-RGD (pH 5.5)                 | 0.8597           | 4.0460  | 0.3754 | 0.0003    | 0.8746            | 0.0206 | -0.0020 | 0.0002    | 0.9422        | 2.5970 | 4.1900  | <0.0001   | 0.9611        | 0.1463 | 0.6868  | <0.0001   |
|     | GO-HA-RGD (pH 7.4)                 | 0.7367           | 1.3790  | 0.0866 | 0.0031    | 0.7390            | 0.0063 | -0.0004 | 0.0030    | 0.8464        | 1.0530 | 0.9913  | 0.0004    | 0.8996        | 0.2068 | 0.5885  | <0.0001   |
| 2   | GO-PAC/HEC (pH 5.0)                | 0.6516           | 14.0100 | 1.4560 | 0.0085    | 0.7768            | 0.1097 | -0.0155 | 0.0017    | 0.8431        | 9.4020 | 11.2100 | 0.0005    | 0.9694        | 0.1317 | 0.4790  | <0.0001   |
|     | GO-PAC/HEC (pH 7.4)                | 0.6231           | 4.2050  | 0.4109 | 0.0114    | 0.6409            | 0.0214 | -0.0022 | 0.0095    | 0.8261        | 2.8560 | 3.1950  | 0.0007    | 0.9502        | 0.1122 | 0.3106  | <0.0001   |
| 3   | NGO-PEG-DA (pH 5.0)                | 0.7288           | 5.6380  | 1.0000 | 0.0145    | 0.7710            | 0.0273 | -0.0054 | 0.0093    | 0.8783        | 3.7760 | 6.2000  | 0.0018    | 0.8823        | 0.3178 | 0.5784  | 0.0017    |
|     | NGO-PEG-DA (pH 6.8)                | 0.9860           | 0.5752  | 0.4491 | 0.0007    | 0.9869            | 0.0026 | -0.0021 | 0.0006    | 0.9609        | 0.9626 | 2.6140  | 0.0033    | 0.9720        | 0.1224 | 0.4757  | 0.0020    |
|     | NGO-PEG-DA (pH 7.4)                | 0.3289           | 0.7194  | 0.0521 | 0.2341    | 0.3297            | 0.0033 | -0.0002 | 0.2333    | 0.4790        | 0.6339 | 0.3750  | 0.1276    | 0.6881        | 0.1123 | 0.1420  | 0.0823    |
|     | NGO-PEG-SA (pH 5.0)                | 0.8149           | 2.7040  | 0.5874 | 0.0137    | 0.8389            | 0.0129 | -0.0030 | 0.0103    | 0.9244        | 1.7280 | 3.7480  | 0.0022    | 0.9273        | 0.1383 | 0.3774  | 0.0020    |
|     | NGO-PEG-SA (pH 6.8)                | 0.9118           | 0.8705  | 0.2898 | 0.0030    | 0.9177            | 0.0039 | -0.0014 | 0.0026    | 0.9498        | 0.6563 | 1.7660  | 0.0010    | 0.9488        | 0.1248 | 0.4064  | 0.0010    |
|     | NGO-PEG-SA (pH 7.4)                | 0.4873           | 0.6833  | 0.0690 | 0.1230    | 0.4875            | 0.0031 | -0.0003 | 0.1229    | 0.6830        | 0.5373 | 0.4885  | 0.0426    | 0.8610        | 0.0789 | 0.1489  | 0.0076    |

Table S5 continued.

|   |                                                    |        |         |        |         |        |        |         |         |        |        |         |         |        |        |        |         |
|---|----------------------------------------------------|--------|---------|--------|---------|--------|--------|---------|---------|--------|--------|---------|---------|--------|--------|--------|---------|
| 4 | GO-PEG-SS-HY (pH 5.5)                              | 0.7834 | 5.5160  | 0.5572 | 0.0035  | 0.8080 | 0.0270 | -0.0029 | 0.0024  | 0.9150 | 3.4550 | 4.8180  | 0.0002  | 0.9451 | 0.2685 | 0.7420 | <0.0001 |
|   | GO-PEG-SS-HY (pH 7.4)                              | 0.8061 | 1.7590  | 0.1905 | 0.0025  | 0.8158 | 0.0079 | -0.0009 | 0.0021  | 0.9304 | 1.0540 | 1.6370  | 0.0010  | 0.9309 | 0.2553 | 0.6243 | 0.0001  |
| 5 | GO-TD-Fe <sub>3</sub> O <sub>4</sub> -PEG (pH 5.0) | 0.8382 | 12.7700 | 0.9711 | 0.0104  | 0.9618 | 0.1224 | -0.0205 | 0.0006  | 0.9327 | 8.2350 | 10.8800 | 0.0017  | 0.9817 | 0.1460 | 0.8623 | 0.0001  |
|   | GO-TD-Fe <sub>3</sub> O <sub>4</sub> -PEG (pH 6.8) | 0.8707 | 7.7460  | 0.6708 | 0.0066  | 0.9491 | 0.0402 | -0.0058 | 0.0010  | 0.9539 | 4.6270 | 7.4400  | 0.0008  | 0.9762 | 0.1146 | 0.5875 | 0.0002  |
|   | GO-TD-Fe <sub>3</sub> O <sub>4</sub> -PEG (pH 7.4) | 0.8600 | 8.2610  | 0.6827 | 0.0077  | 0.9315 | 0.0448 | -0.0055 | 0.0018  | 0.9453 | 5.1630 | 7.6100  | 0.0011  | 0.9708 | 0.1378 | 0.6413 | 0.0003  |
| 6 | Zn-d-3 rGO (pH 5.4)                                | 0.9085 | 8.3930  | 0.2445 | <0.0001 | 0.9652 | 0.0424 | -0.0021 | <0.0001 | 0.9846 | 3.4440 | 4.5410  | <0.0001 | 0.9870 | 0.1310 | 0.6047 | <0.0001 |
|   | Zn-d-3 rGO (pH 7.4)                                | 0.8866 | 6.8670  | 0.1775 | <0.0001 | 0.9137 | 0.0401 | -0.0012 | <0.0001 | 0.9689 | 3.5960 | 3.3110  | <0.0001 | 0.9749 | 0.1507 | 0.4893 | <0.0001 |
|   | GO (pH 5.4)                                        | 0.5447 | 9.1330  | 0.0923 | 0.0011  | 0.5871 | 0.0543 | -0.0006 | 0.0005  | 0.7012 | 7.3990 | 1.8680  | <0.0001 | 0.7854 | 0.2941 | 0.2983 | <0.0001 |
|   | GO (pH 7.4)                                        | 0.4561 | 7.9940  | 0.0676 | 0.0041  | 0.4868 | 0.0445 | -0.4007 | 0.0027  | 0.6016 | 6.8420 | 1.3860  | 0.0004  | 0.6859 | 0.3441 | 0.2699 | <0.0001 |
| 7 | GO/(PHEM A-g-PLA)-b-PEG-b-(PHEMA-g-PLA) (pH 5.4)   | 0.8553 | 4.2930  | 0.3590 | 0.0029  | 0.8972 | 0.0215 | -0.0022 | 0.0012  | 0.9515 | 2.4850 | 3.5180  | 0.0002  | 0.9830 | 0.0752 | 0.2862 | <0.0001 |
|   | GO/(PHEM A-g-PLA)-b-PEG-b-(PHEMA-g-PLA) (pH 7.4)   | 0.5818 | 4.6230  | 0.1877 | 0.0461  | 0.6073 | 0.0233 | -0.0010 | 0.0389  | 0.7737 | 3.4010 | 2.0090  | 0.0090  | 0.9155 | 0.1507 | 0.2485 | 0.0007  |

Table S5 continued.

|    |                                                                  |        |             |             |             |        |        |         |             |        |        |         |             |        |        |        |             |
|----|------------------------------------------------------------------|--------|-------------|-------------|-------------|--------|--------|---------|-------------|--------|--------|---------|-------------|--------|--------|--------|-------------|
| 8  | FA-BSA/GO (pH 5.0)                                               | 0.7846 | 4.9480      | 0.1434      | <0.00<br>01 | 0.8607 | 0.0388 | -0.0015 | <0.00<br>01 | 0.9091 | 3.2150 | 2.4120  | <0.00<br>01 | 0.9772 | 0.0462 | 0.2224 | <0.000<br>1 |
|    | FA-BSA/GO (pH 7.4)                                               | 0.9032 | 3.0740      | 0.1414      | <0.00<br>01 | 0.9427 | 0.0181 | -0.0011 | <0.00<br>01 | 0.9747 | 1.5700 | 2.3110  | <0.00<br>1  | 0.9754 | 0.0505 | 0.2333 | <0.000<br>1 |
| 9  | NGO-HDex (pH 5.5)                                                | 0.9624 | 1.4320      | 0.1591      | <0.00<br>01 | 0.9755 | 0.0060 | -0.0008 | <0.00<br>01 | 0.9975 | 0.3679 | 2.5960  | <0.00<br>01 | 0.9982 | 0.0491 | 0.7256 | <0.000<br>1 |
|    | NGO-HDex (pH 7.4)                                                | 0.9914 | 0.4737      | 0.1115      | <0.00<br>01 | 0.9942 | 0.0020 | -0.0006 | <0.00<br>01 | 0.9909 | 0.4850 | 1.7830  | <0.00<br>01 | 0.9892 | 0.0456 | 0.5493 | <0.000<br>1 |
| 10 | GO (pH 2)                                                        | 0.8323 | 9.4940      | 1.9300      | 0.000<br>6  | 0.9360 | 0.0475 | -0.0166 | <0.00<br>01 | 0.9322 | 6.0360 | 13.8200 | <0.00<br>1  | 0.9123 | 0.2907 | 0.8191 | <0.000<br>1 |
|    | GO (pH 7)                                                        | 0.5794 | 2.5280      | 0.2707      | 0.017<br>2  | 0.5928 | 0.0114 | -0.0013 | 0.015<br>2  | 0.7161 | 2.0770 | 2.0330  | 0.004<br>0  | 0.6499 | 0.9266 | 1.0960 | 0.0087      |
|    | GO (pH 10)                                                       | 0.6437 | 4.3820      | 0.5377      | 0.009<br>3  | 0.6752 | 0.0214 | -0.0028 | 0.006<br>6  | 0.7846 | 3.4080 | 4.0100  | 0.001<br>5  | 0.7796 | 0.3244 | 0.5299 | 0.0016      |
| 11 | Fe <sub>3</sub> O <sub>4</sub> /GO /Chitosan (Normal Release)    | 0.9845 | 1.6310      | 37.350<br>0 | <0.00<br>01 | 0.9958 | 0.0048 | -0.2097 | <0.00<br>01 | 0.9990 | 0.1024 | 53.5100 | <0.00<br>01 | 0.9877 | 0.0970 | 1.1750 | <0.000<br>1 |
|    | Fe <sub>3</sub> O <sub>4</sub> /GO /Chitosan (NIR assist)        | 0.9429 | 3.4260      | 47.260<br>0 | <0.00<br>01 | 0.9643 | 0.0165 | -0.2903 | <0.00<br>01 | 0.9690 | 2.5240 | 66.8100 | <0.00<br>01 | 0.9337 | 0.1954 | 1.1330 | <0.000<br>1 |
|    | Fe <sub>3</sub> O <sub>4</sub> /GO /Chitosan (Ultrasound assist) | 0.9221 | 3.5230      | 41.190<br>0 | <0.00<br>01 | 0.9464 | 0.0177 | -0.2521 | <0.00<br>01 | 0.9538 | 2.7130 | 58.2800 | <0.00<br>01 | 0.9096 | 0.1949 | 0.9507 | <0.000<br>1 |
| 12 | PF127/GN (pH 5)                                                  | 0.6961 | 10.400<br>0 | 0.5477      | 0.000<br>2  | 0.7494 | 0.0653 | -0.0039 | <0.00<br>01 | 0.8444 | 7.4430 | 6.2500  | <0.00<br>01 | 0.8964 | 0.2533 | 0.5527 | <0.000<br>1 |
|    | PF127/GN (pH 7)                                                  | 0.5976 | 4.1360      | 0.1530      | 0.008<br>7  | 0.6186 | 0.0200 | -0.0008 | 0.007<br>0  | 0.7643 | 3.1650 | 1.7720  | 0.000<br>9  | 0.7734 | 0.3306 | 0.3658 | 0.0008      |
|    | PF127/GN (pH 9)                                                  | 0.6758 | 5.2130      | 0.2492      | 0.000<br>6  | 0.7080 | 0.0254 | -0.0013 | 0.000<br>3  | 0.8405 | 3.6560 | 2.7340  | <0.00<br>01 | 0.8397 | 0.3609 | 0.4695 | <0.000<br>1 |

Table S5 continued.

|    |                         |        |        |        |             |        |        |         |             |        |        |         |             |        |        |        |             |
|----|-------------------------|--------|--------|--------|-------------|--------|--------|---------|-------------|--------|--------|---------|-------------|--------|--------|--------|-------------|
| 13 | GO-A-Im (pH 3.4)        | 0.5645 | 9.0460 | 0.4400 | 0.001<br>2  | 0.6732 | 0.0794 | -0.0049 | 0.000<br>2  | 0.7116 | 7.3610 | 5.6740  | <0.00<br>01 | 0.8374 | 0.1681 | 0.4707 | <0.000<br>1 |
|    | GO-A-Im (pH 5.4)        | 0.6178 | 9.2160 | 0.5384 | 0.000<br>9  | 0.7175 | 0.0737 | -0.0540 | 0.000<br>1  | 0.7600 | 7.3040 | 6.5920  | <0.00<br>01 | 0.8626 | 0.1750 | 0.5450 | <0.000<br>1 |
|    | GO-A-Im (pH 7.4)        | 0.5040 | 2.9850 | 0.1293 | 0.003<br>1  | 0.5113 | 0.0175 | -0.0008 | 0.002<br>7  | 0.6534 | 2.4930 | 1.6770  | 0.000<br>3  | 0.8166 | 0.0849 | 0.2225 | <0.000<br>1 |
| 14 | GO-PEG-FA-SH (pH 4)     | 0.9831 | 1.1960 | 0.0803 | 0.000<br>1  | 0.9920 | 0.0050 | -0.0005 | <0.00<br>01 | 0.9983 | 0.3840 | 1.8550  | <0.00<br>01 | 0.9911 | 0.0390 | 0.4280 | <0.000<br>1 |
|    | GO-PEG-FA-SH (pH 7.4)   | 0.9473 | 1.1310 | 0.0422 | 0.001<br>1  | 0.9542 | 0.0055 | -0.0002 | 0.000<br>8  | 0.9902 | 0.4867 | 0.9882  | <0.00<br>01 | 0.9958 | 0.0221 | 0.3456 | <0.000<br>1 |
|    | GO-PEG-FA/GNPs (pH 4)   | 0.9906 | 0.9999 | 0.0902 | <0.00<br>01 | 0.9975 | 0.0032 | -0.0006 | <0.00<br>01 | 0.9970 | 0.5597 | 2.0720  | <0.00<br>01 | 0.9872 | 0.0481 | 0.4389 | <0.000<br>1 |
|    | GO-PEG-FA/GNPs (pH 7.4) | 0.9899 | 0.6842 | 0.0595 | <0.00<br>01 | 0.9943 | 0.0029 | -0.0003 | <0.00<br>01 | 0.9948 | 0.4917 | 1.3610  | <0.00<br>01 | 0.9786 | 0.0507 | 0.3533 | 0.0002      |
| 15 | GO (pH 5)               | 0.9360 | 1.1380 | 0.2956 | <0.00<br>01 | 0.9440 | 0.0051 | -0.0014 | <0.00<br>01 | 0.9887 | 0.4206 | 2.4880  | <0.00<br>01 | 0.9976 | 0.0268 | 0.5345 | <0.000<br>1 |
|    | GO (pH 7.2)             | 0.7671 | 0.6603 | 0.0814 | 0.000<br>4  | 0.7705 | 0.0030 | -0.0004 | 0.000<br>4  | 0.9034 | 0.4253 | 0.7291  | <0.00<br>01 | 0.9491 | 0.1001 | 0.4237 | <0.000<br>1 |
|    | GO (pH 9)               | 0.8733 | 0.5736 | 0.1074 | <0.00<br>01 | 0.8778 | 0.0026 | -0.0005 | <0.00<br>01 | 0.9597 | 0.3233 | 0.9985  | <0.00<br>01 | 0.9742 | 0.0576 | 0.4435 | <0.000<br>1 |
| 16 | GO@Ag (NIR laser)       | 0.9674 | 3.0990 | 1.7810 | 0.016<br>4  | 0.9868 | 0.0123 | -0.0112 | 0.006<br>6  | 0.9931 | 1.4220 | 13.2600 | 0.003<br>4  | 0.9885 | 0.0835 | 1.0540 | 0.0058      |
|    | GO@Ag (No NIR laser)    | 0.9909 | 0.4810 | 0.5285 | 0.004<br>6  | 0.9912 | 0.0022 | -0.0025 | 0.004<br>4  | 0.9831 | 0.6552 | 3.8630  | 0.008<br>5  | 0.9943 | 0.0624 | 1.1190 | 0.0028      |
| 17 | GO-PEG-Fol (pH 5.5)     | 0.8911 | 1.8630 | 0.2953 | 0.001<br>4  | 0.9003 | 0.0091 | -0.0015 | 0.001<br>1  | 0.9735 | 0.9193 | 2.4720  | <0.00<br>01 | 0.9933 | 0.0347 | 0.3185 | <0.000<br>1 |
|    | GO-PEG-Fol (pH 7.4)     | 0.9944 | 0.1602 | 0.1160 | <0.00<br>01 | 0.9947 | 0.0007 | -0.0005 | <0.00<br>01 | 0.9636 | 0.4091 | 0.9255  | 0.000<br>5  | 0.9220 | 0.0853 | 0.2171 | 0.0023      |

**Figure S1-S17.** The linear regression graphs of the zero-order, first-order, Higuchi, and Weibull models for each of the seventeen publications analysed. The equation of the linear regression is displayed as well as the  $R^2$  value for each model under each condition.

**Figure S1.** Linear regression graphs created using results from Paper 1.<sup>[43]</sup>

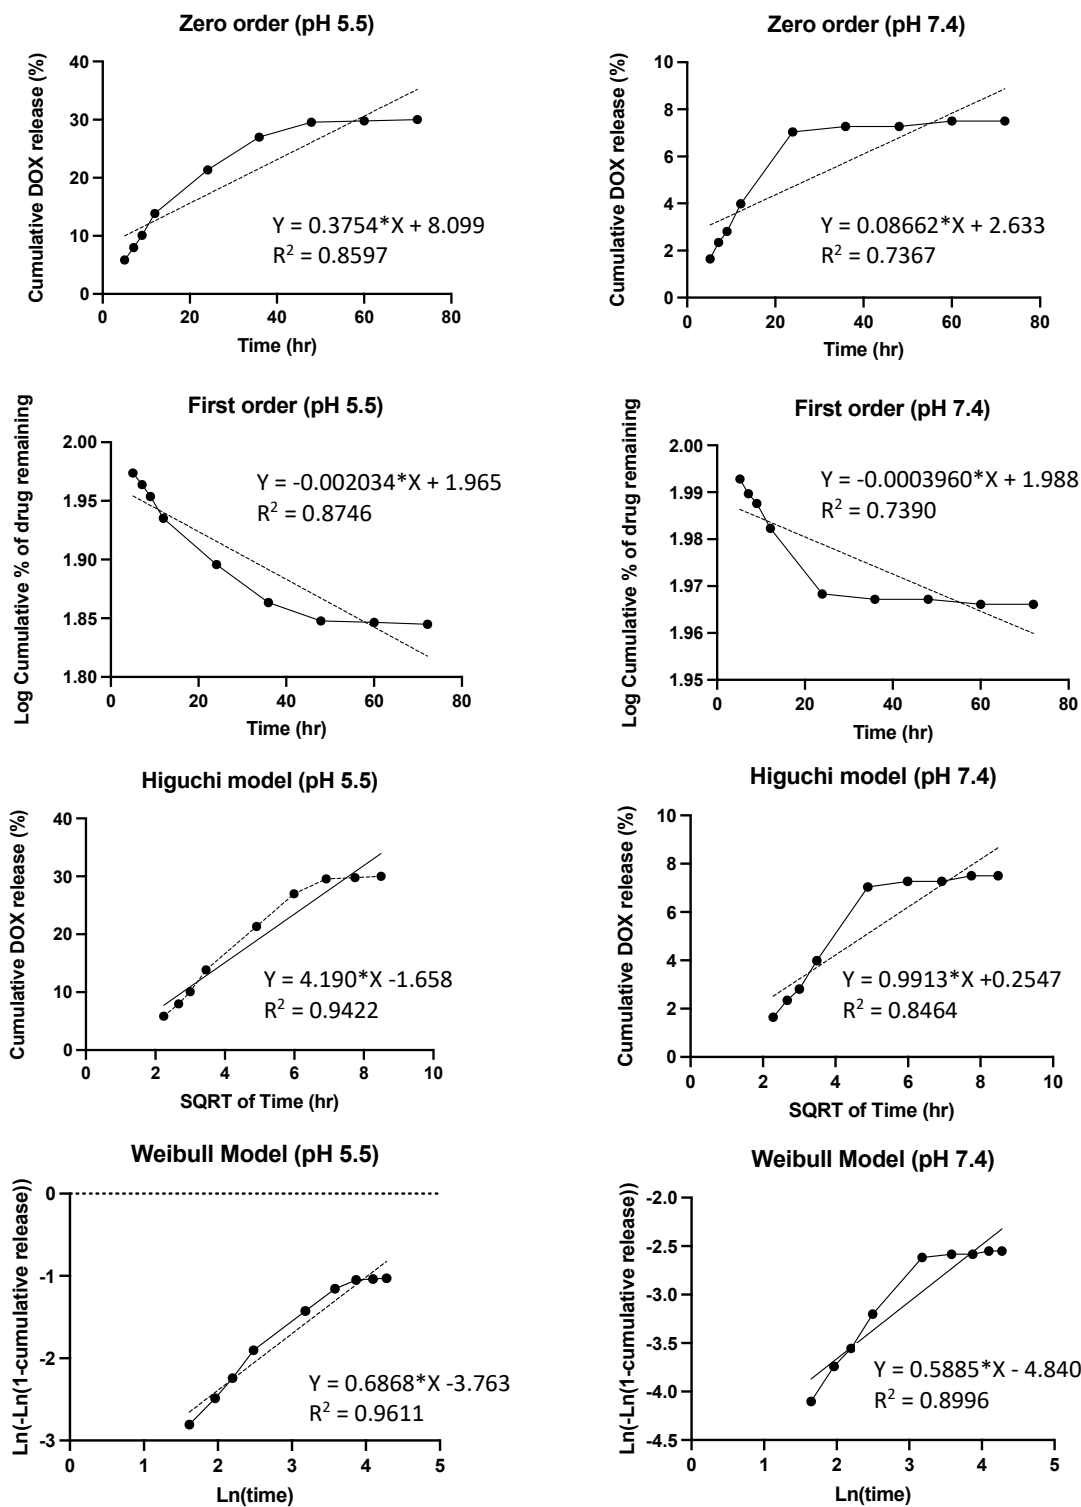

**Figure S2.** Linear regression graphs created using results from Paper 2.<sup>[63]</sup>

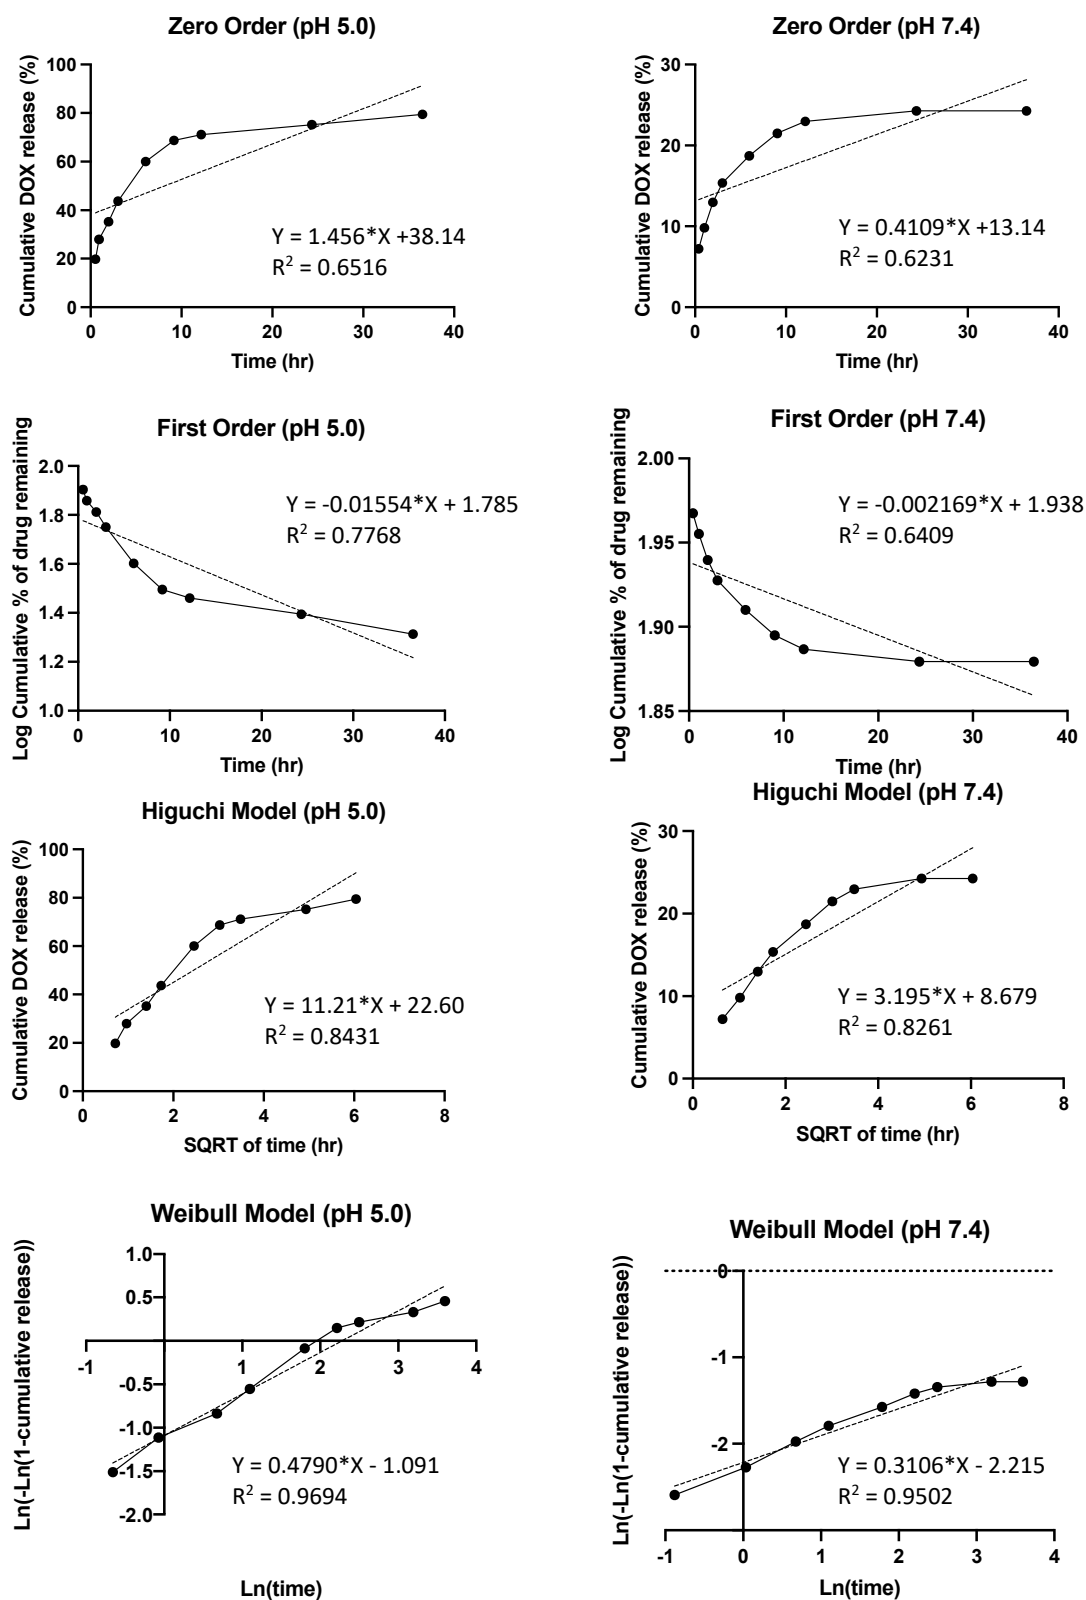

**Figure S3.** Linear regression graphs created using results from Paper 3.<sup>[64]</sup>

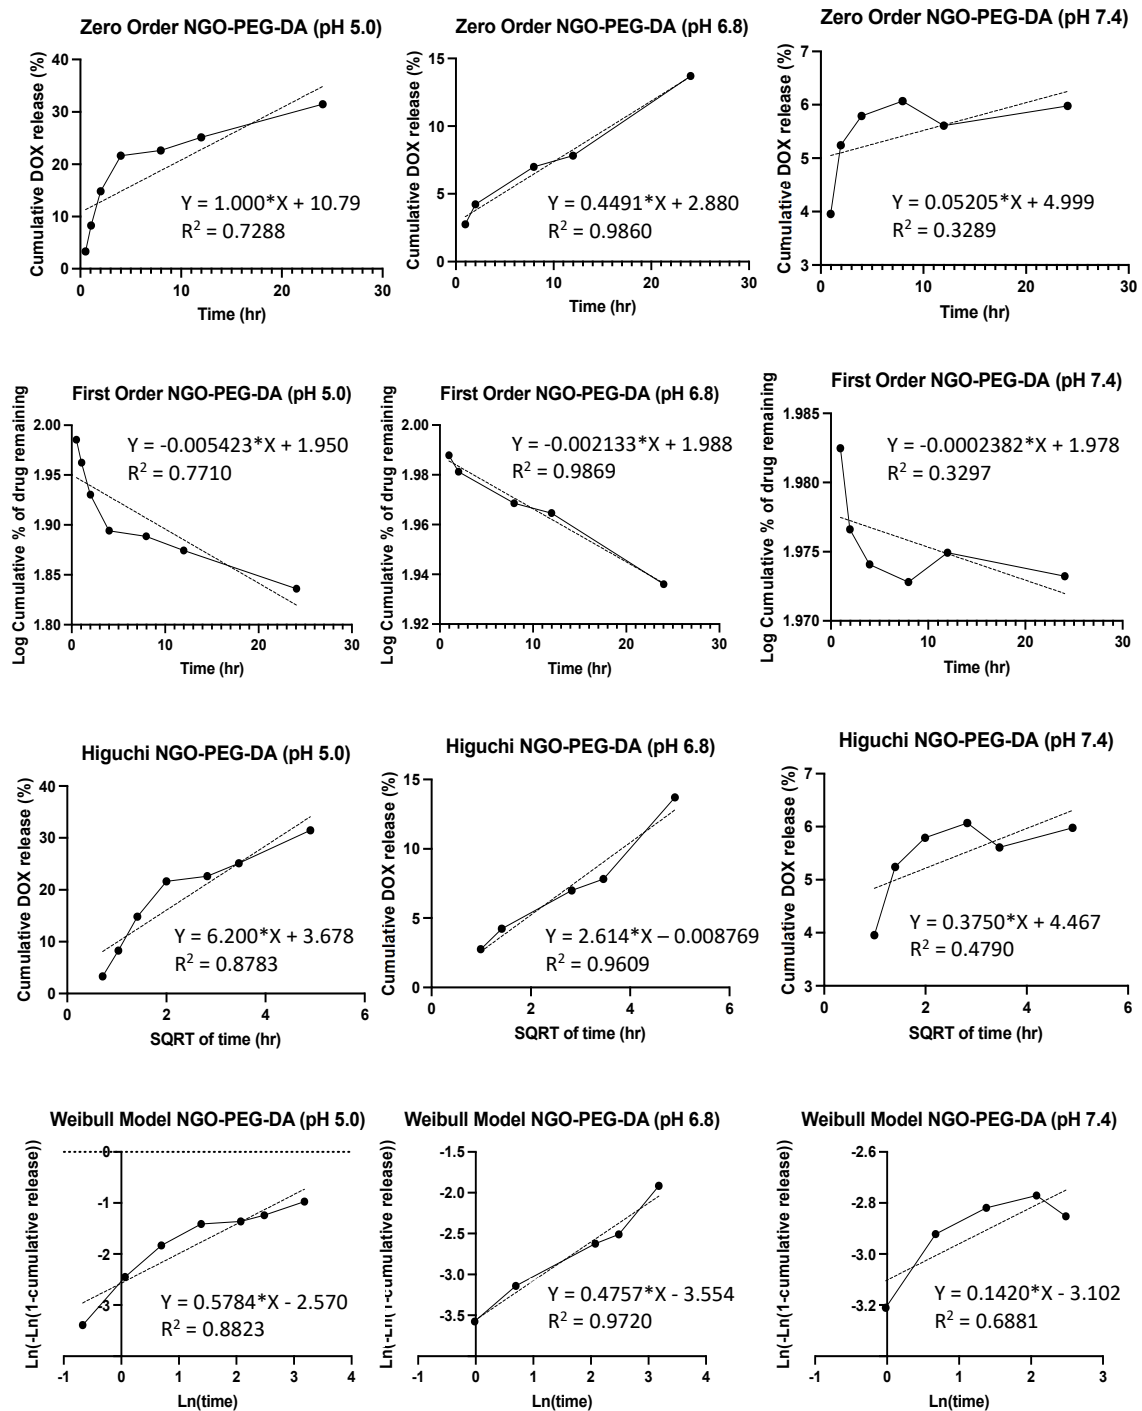

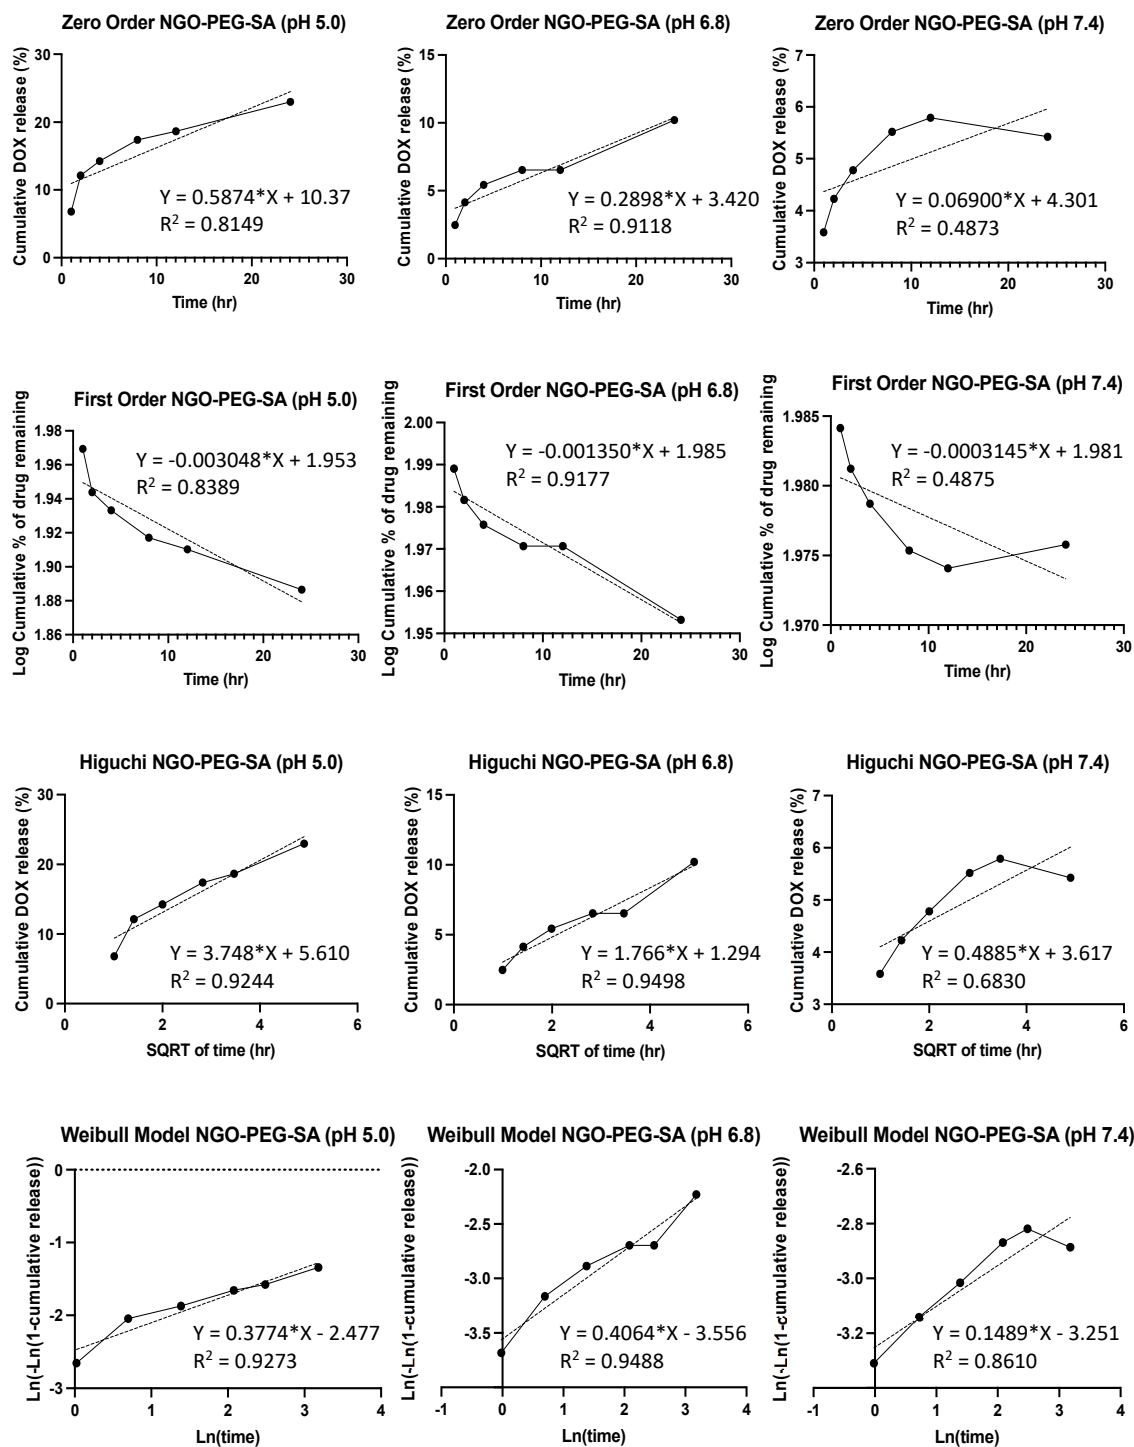

**Figure S4.** Linear regression graphs created using results from Paper 4.<sup>[65]</sup>

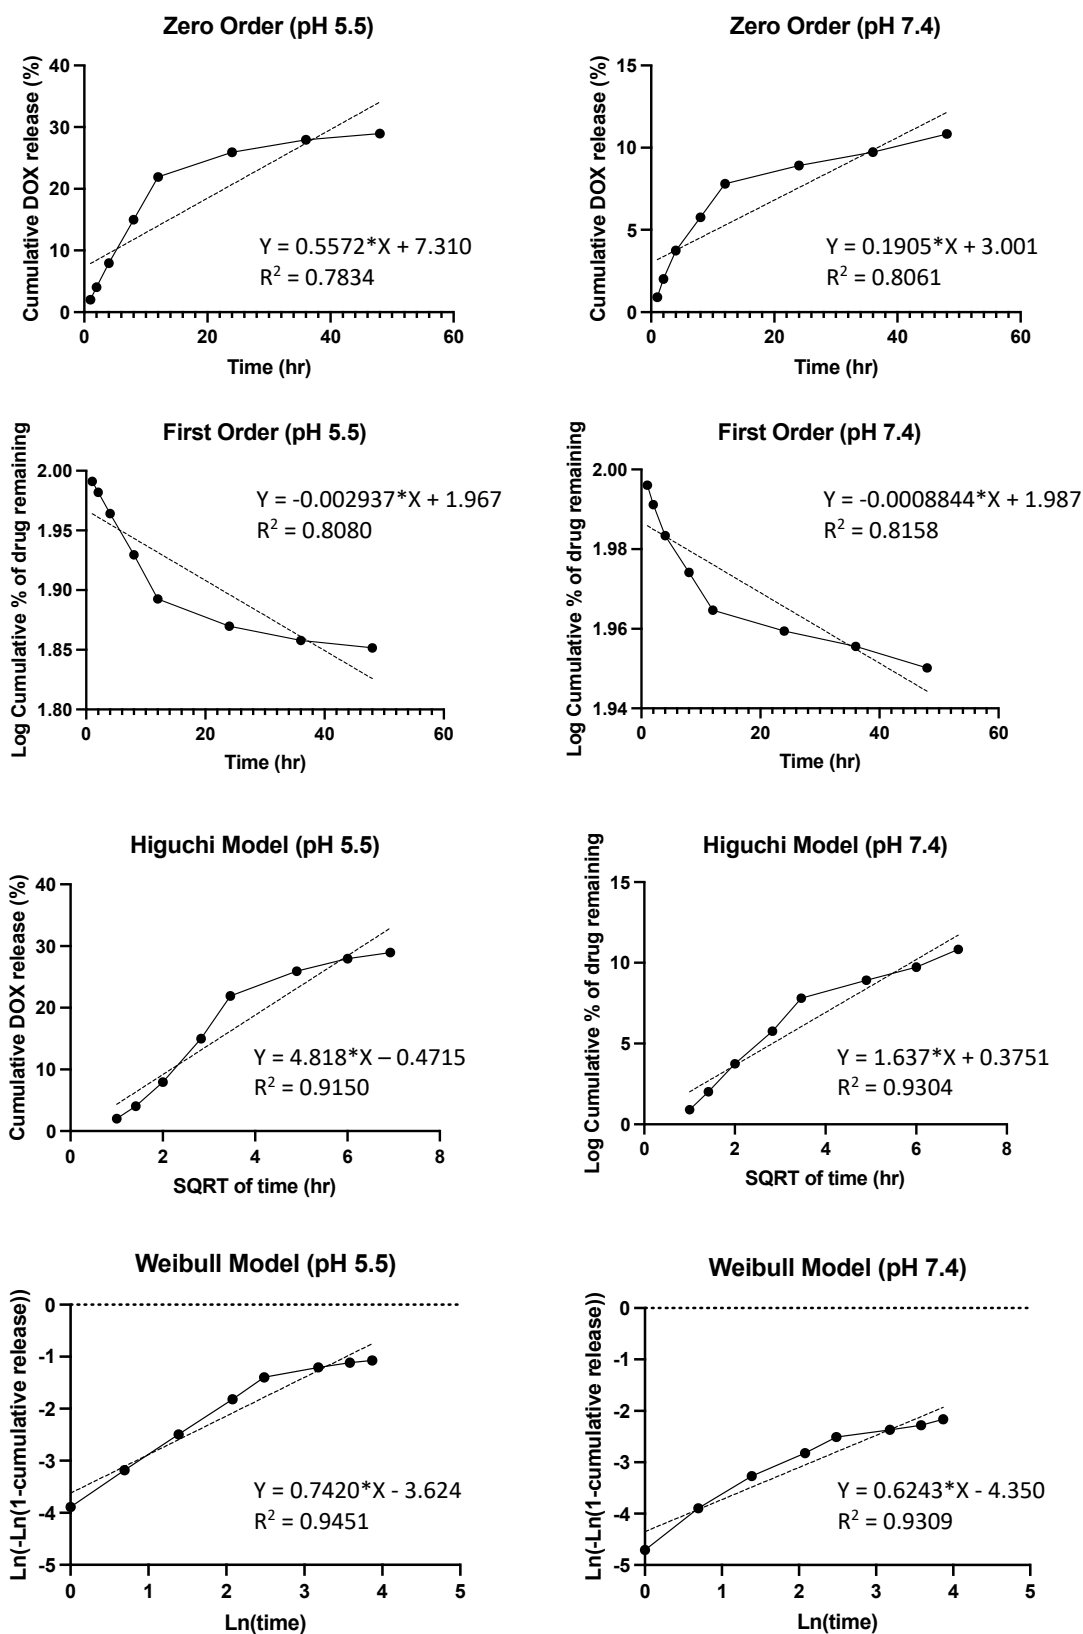

**Figure S5.** Linear regression graphs created using results from Paper 5.<sup>[66]</sup>

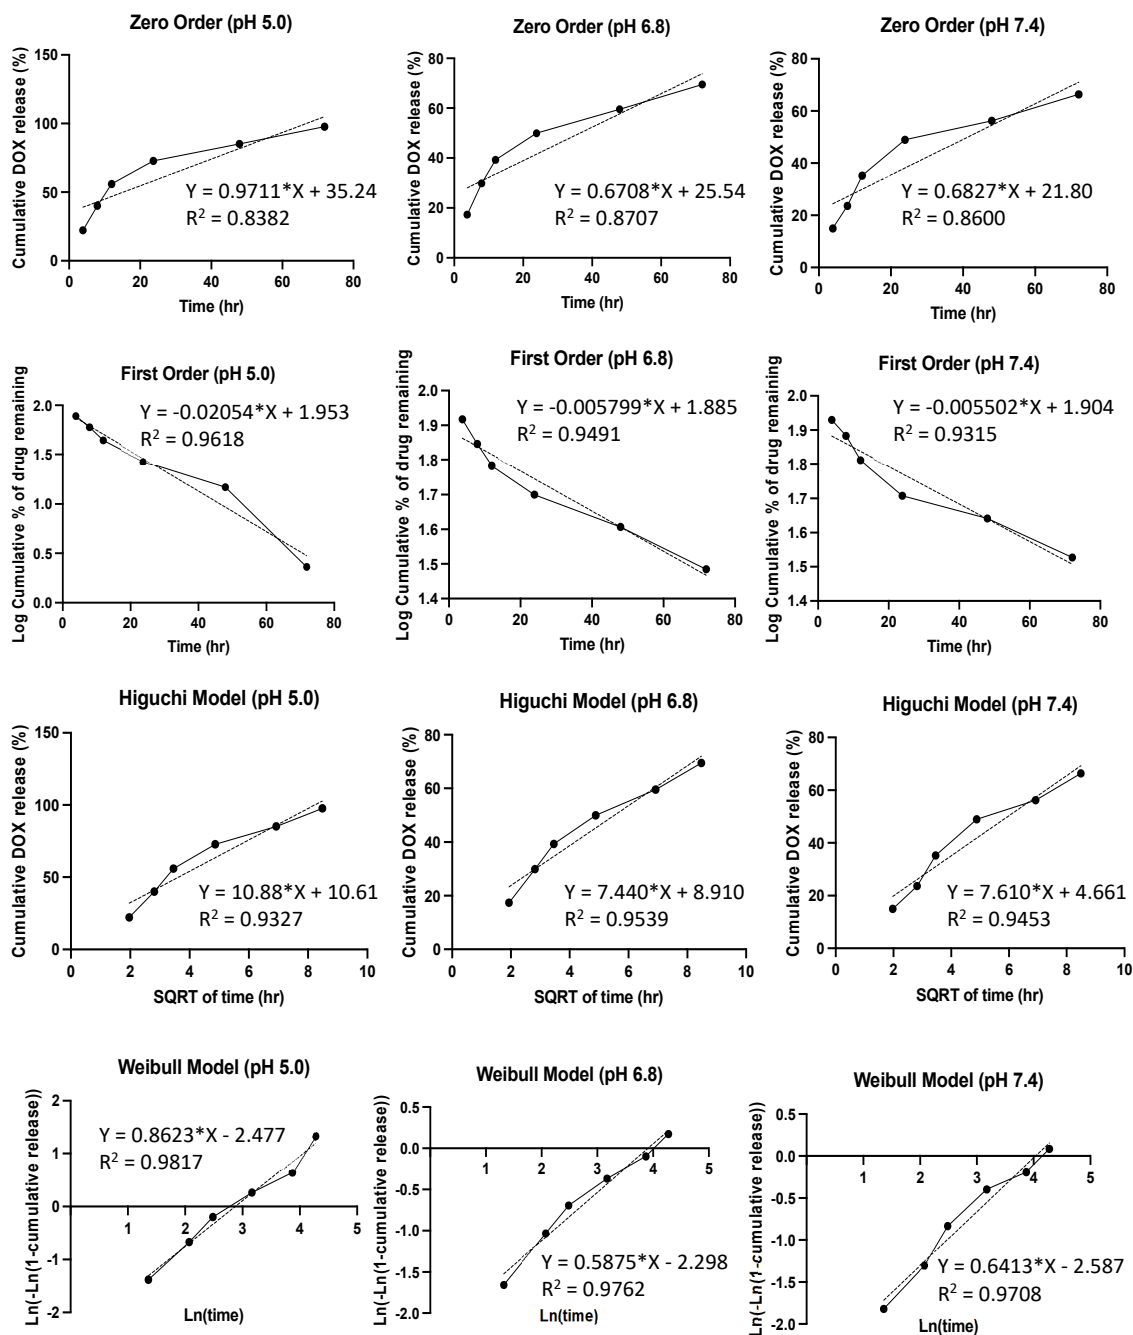

**Figure S6.** Linear regression graphs created using results from Paper 6.<sup>[67]</sup>

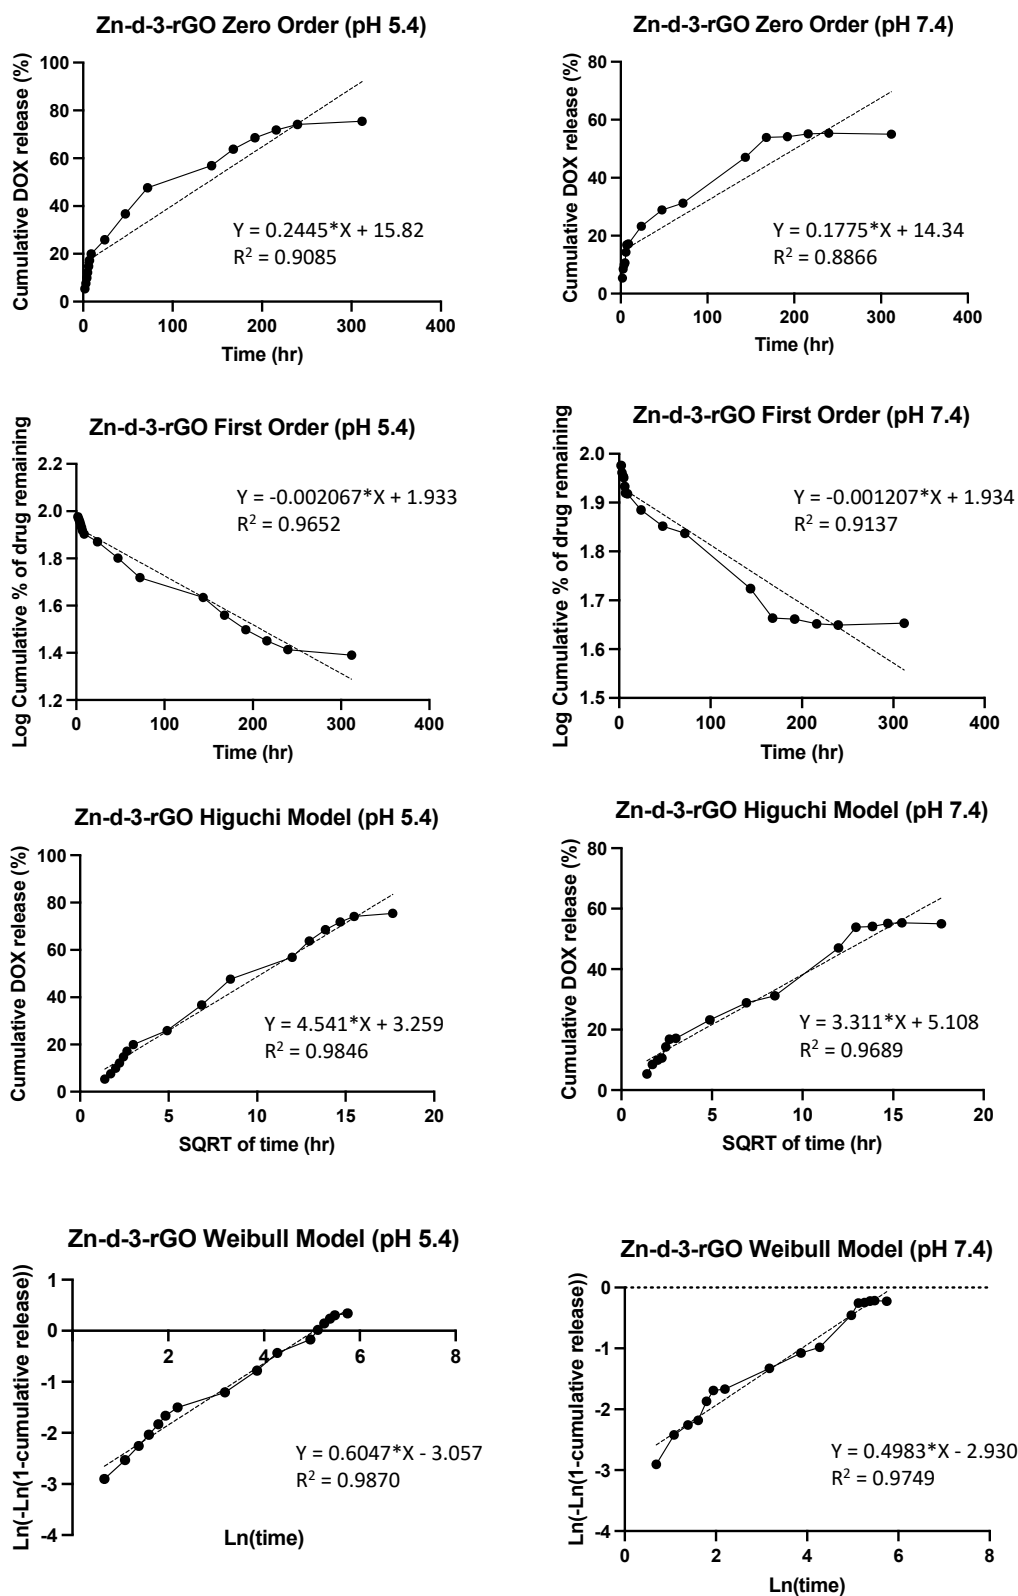

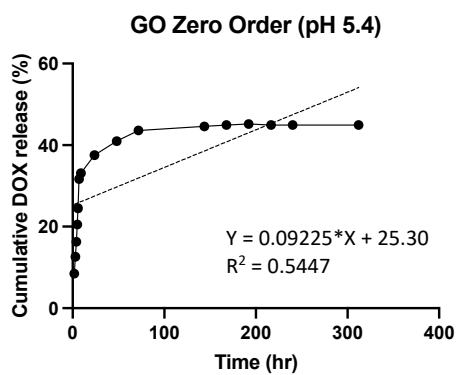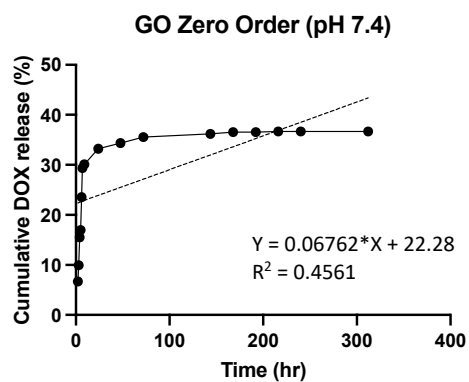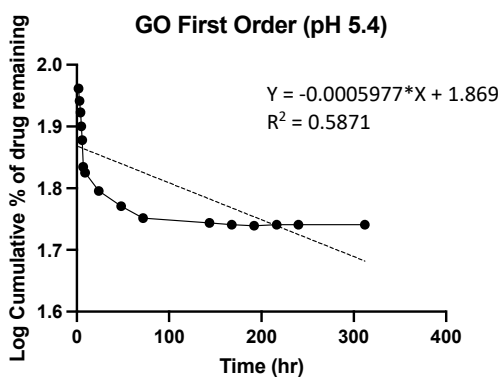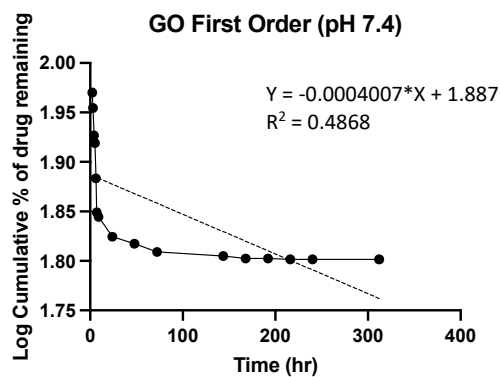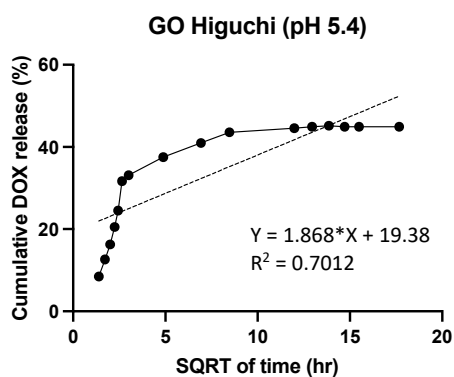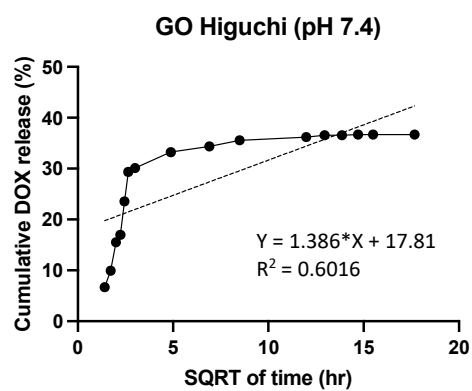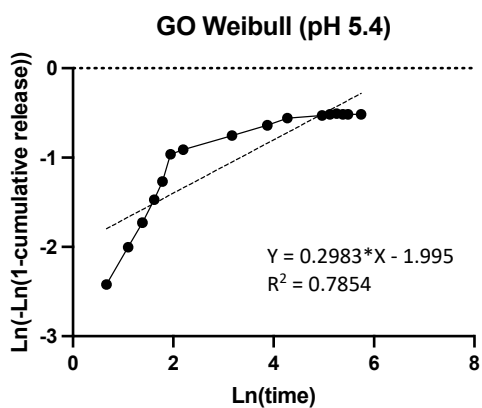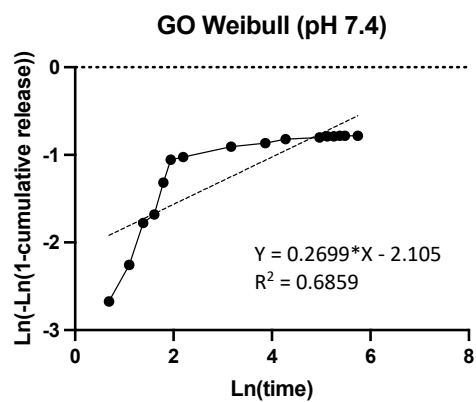

**Figure S7.** Linear regression graphs created using results from Paper 7.<sup>[68]</sup>

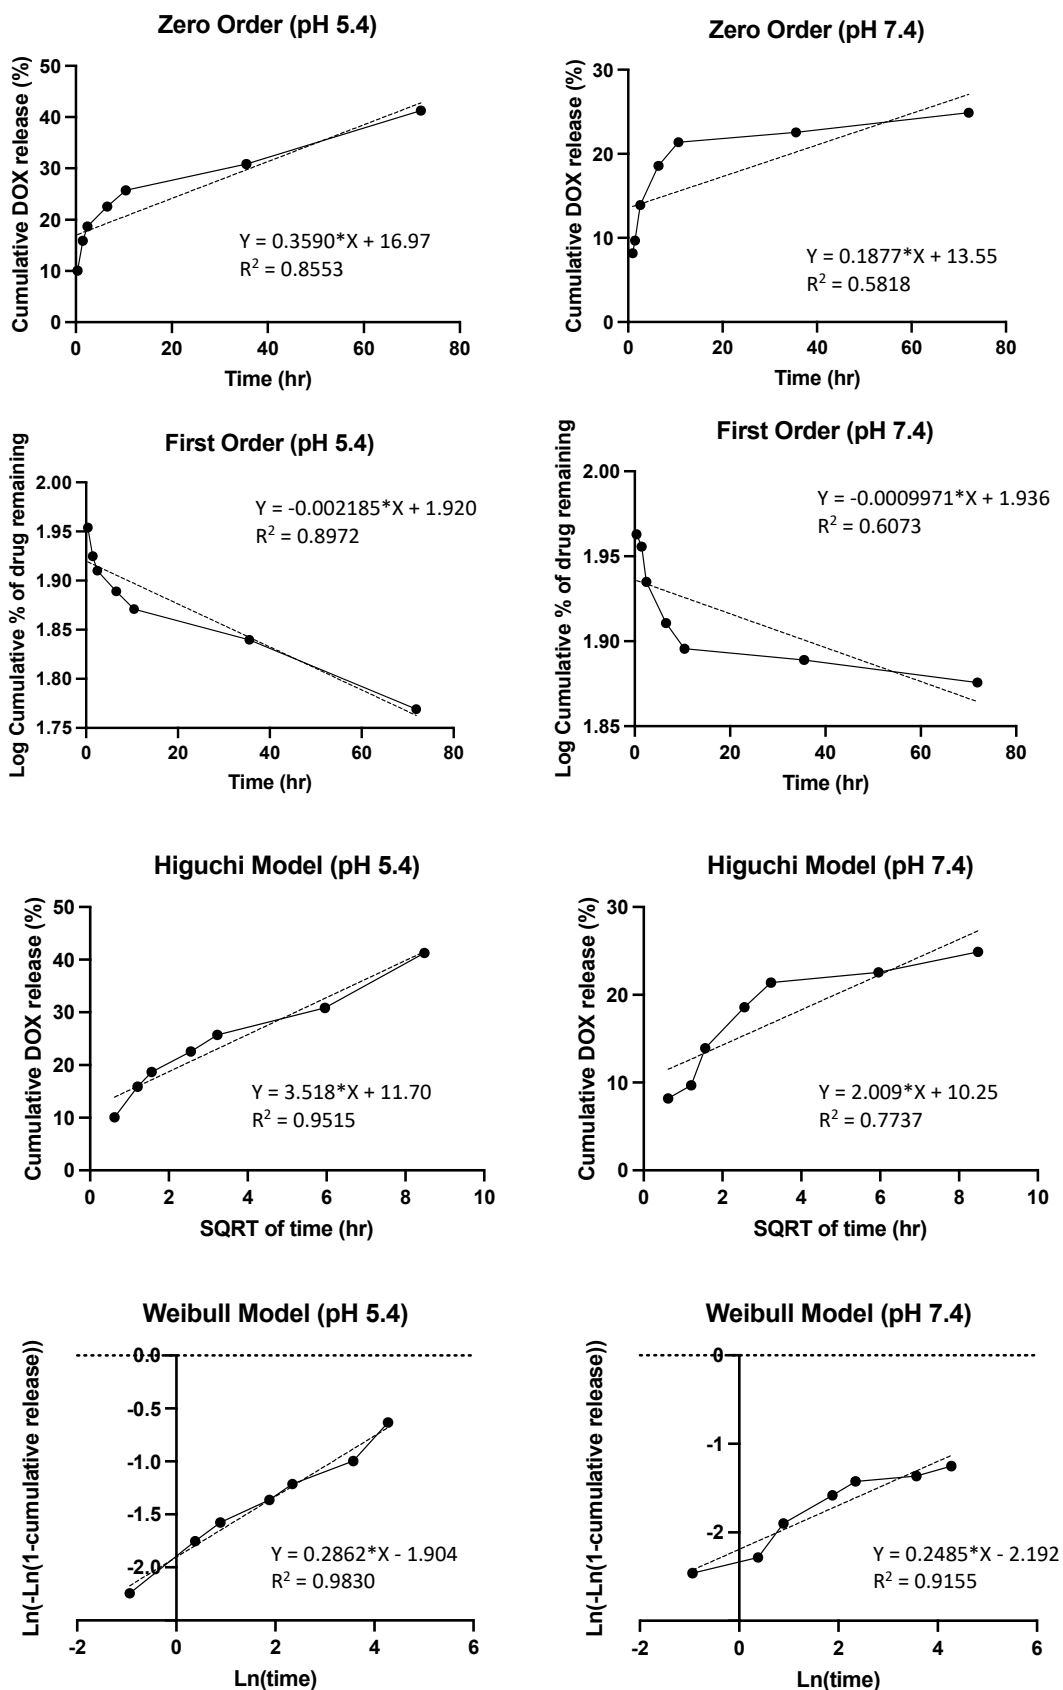

**Figure S8.** Linear regression graphs created using results from Paper 8.<sup>[69]</sup>

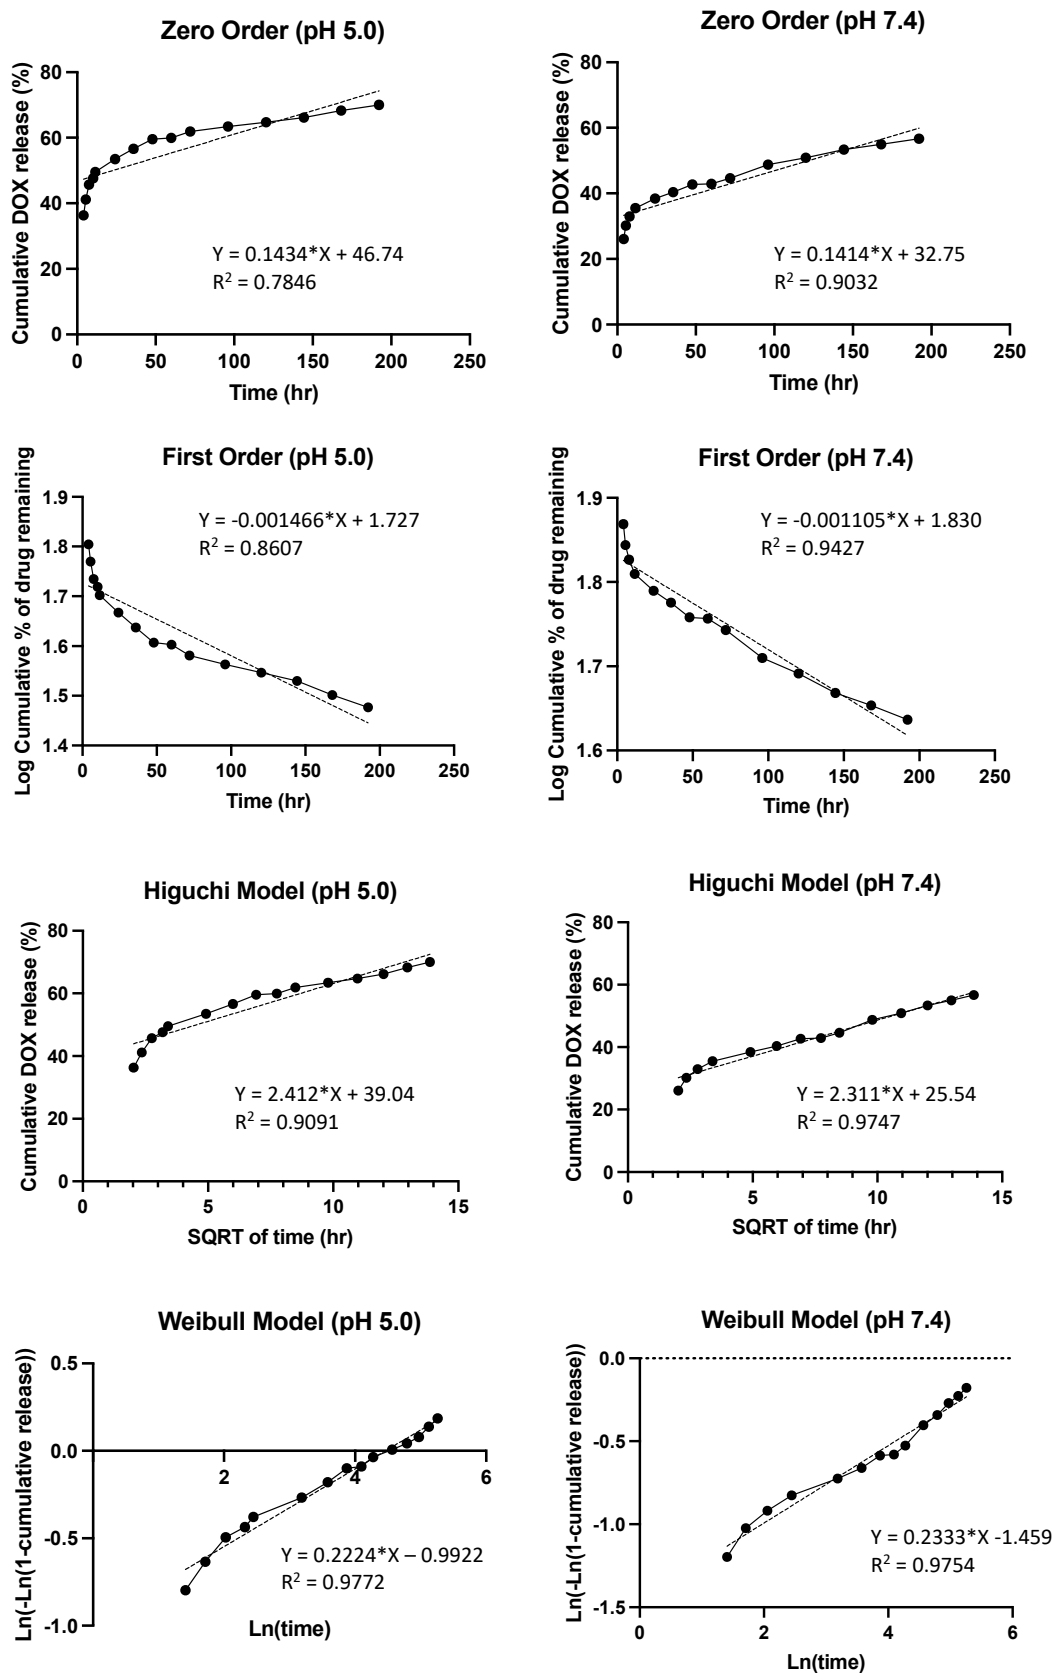

**Figure S9.** Linear regression graphs created using results from Paper 9.<sup>[70]</sup>

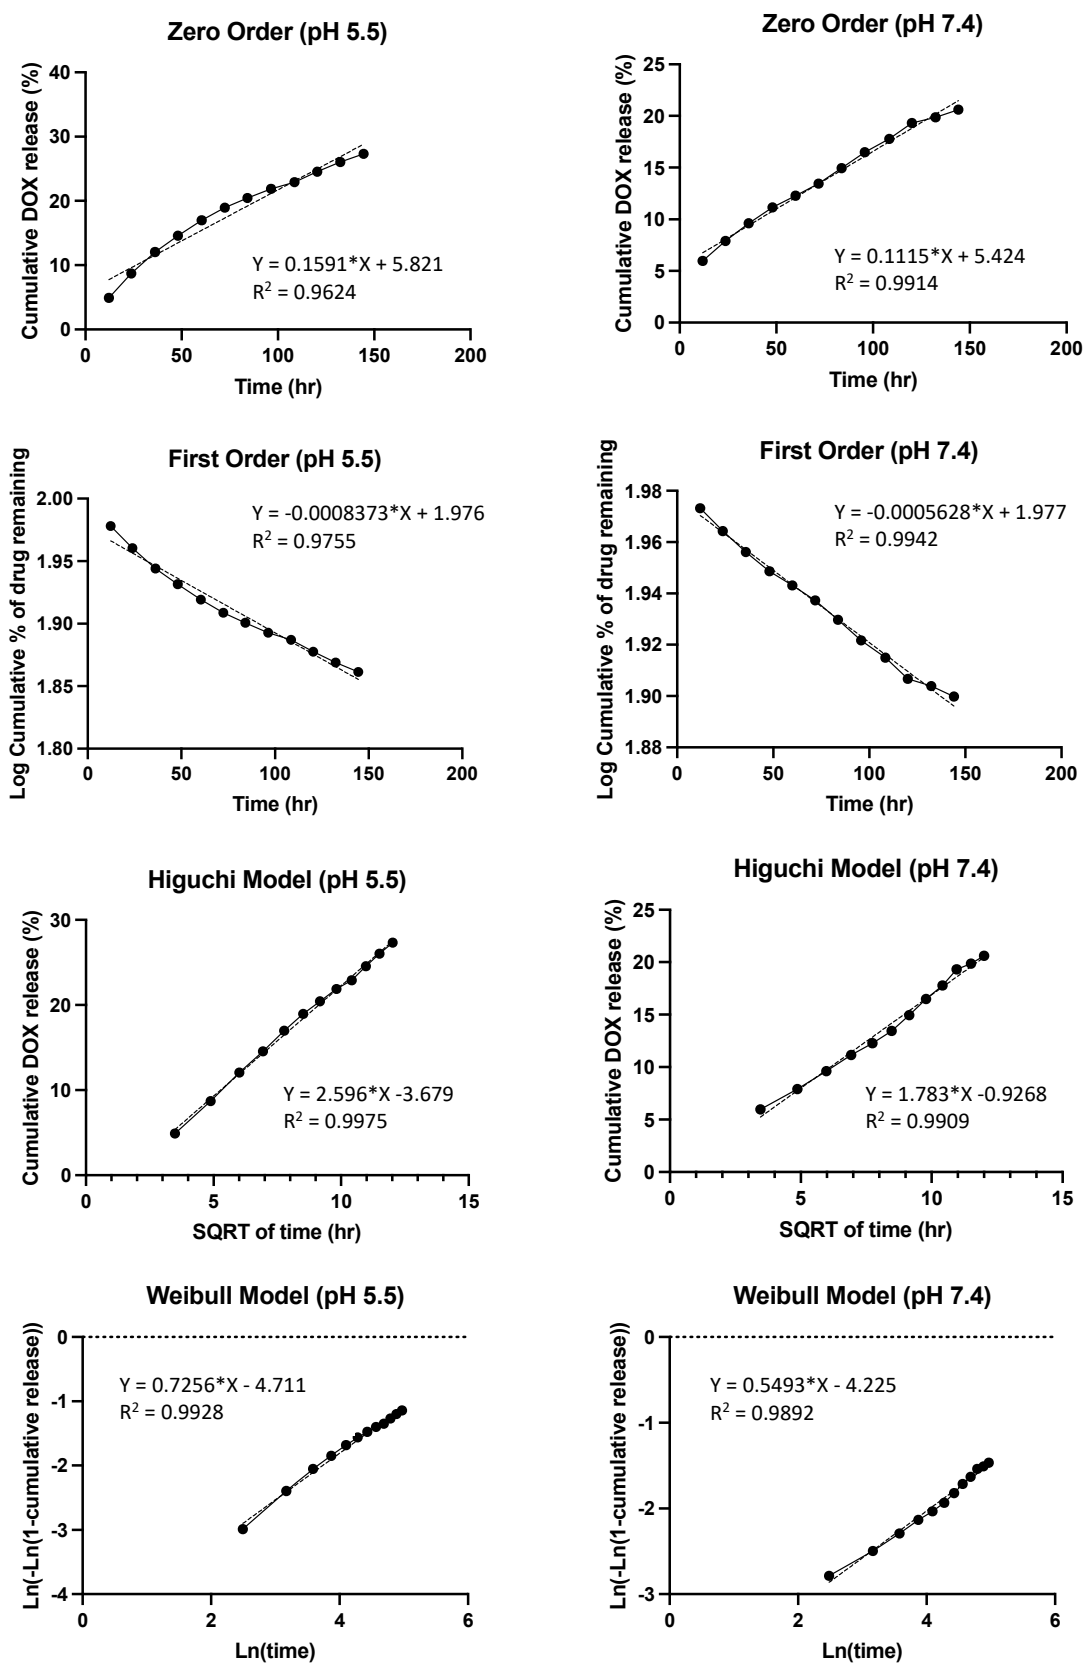

**Figure S10.** Linear regression graphs created using results from Paper 10.<sup>[71]</sup>

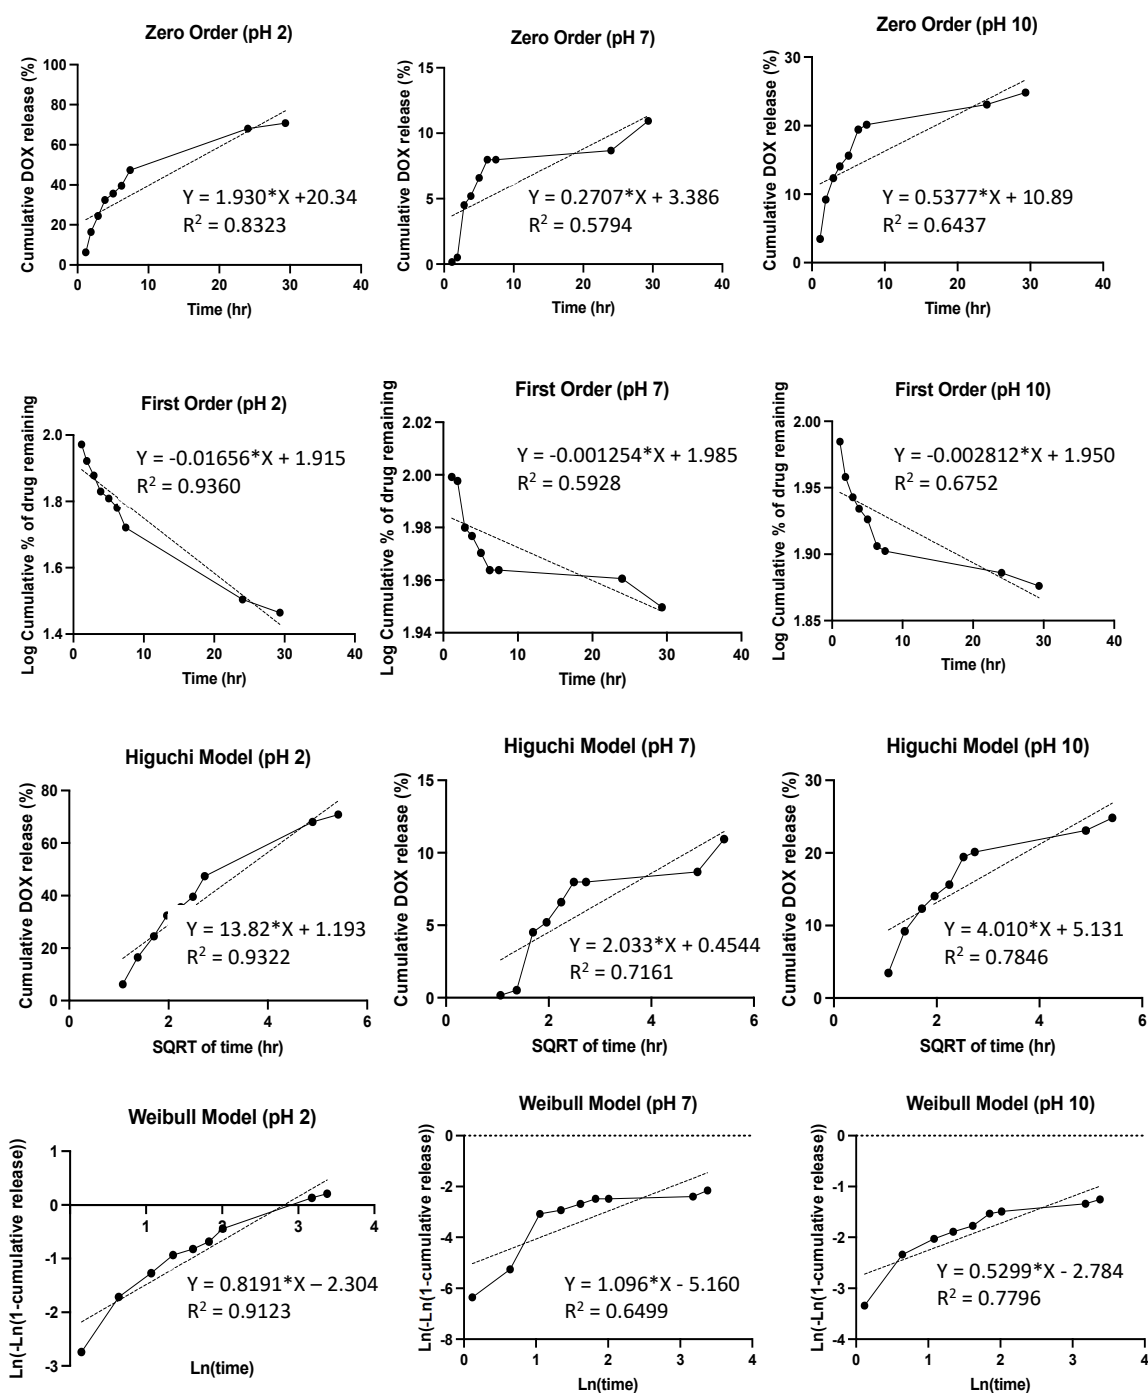

**Figure S11.** Linear regression graphs created using results from Paper 11.<sup>[72]</sup>

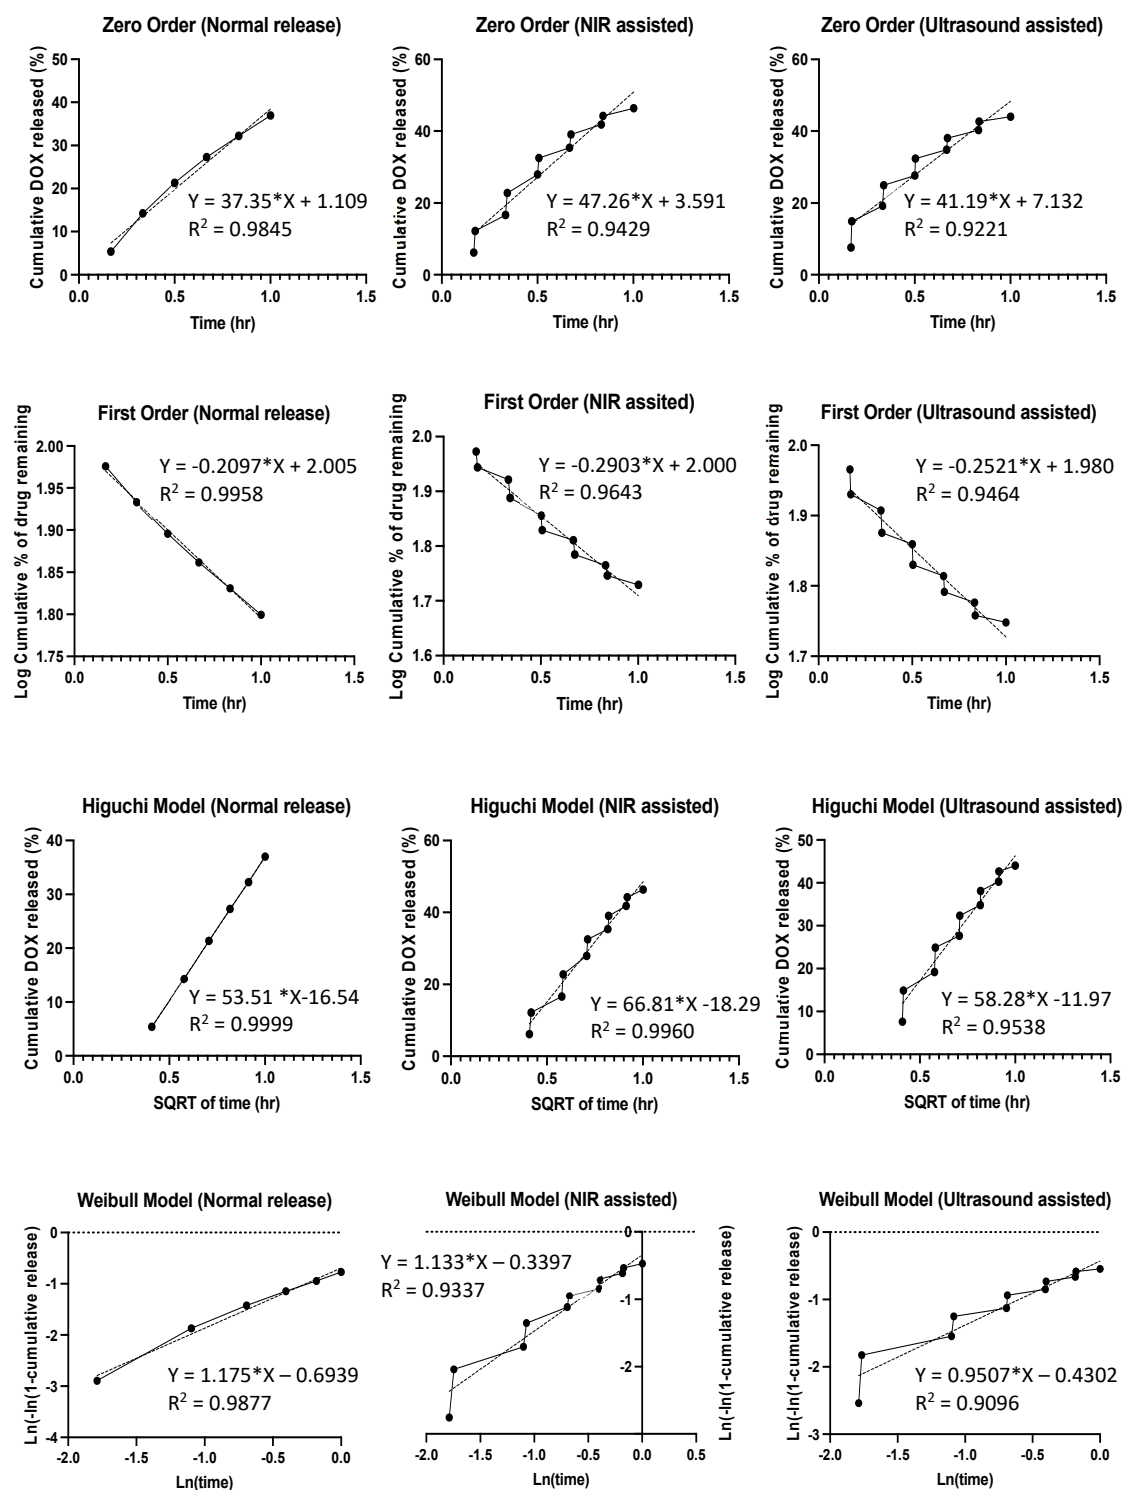

**Figure S12.** Linear regression graphs created using results from Paper 12.<sup>[73]</sup>

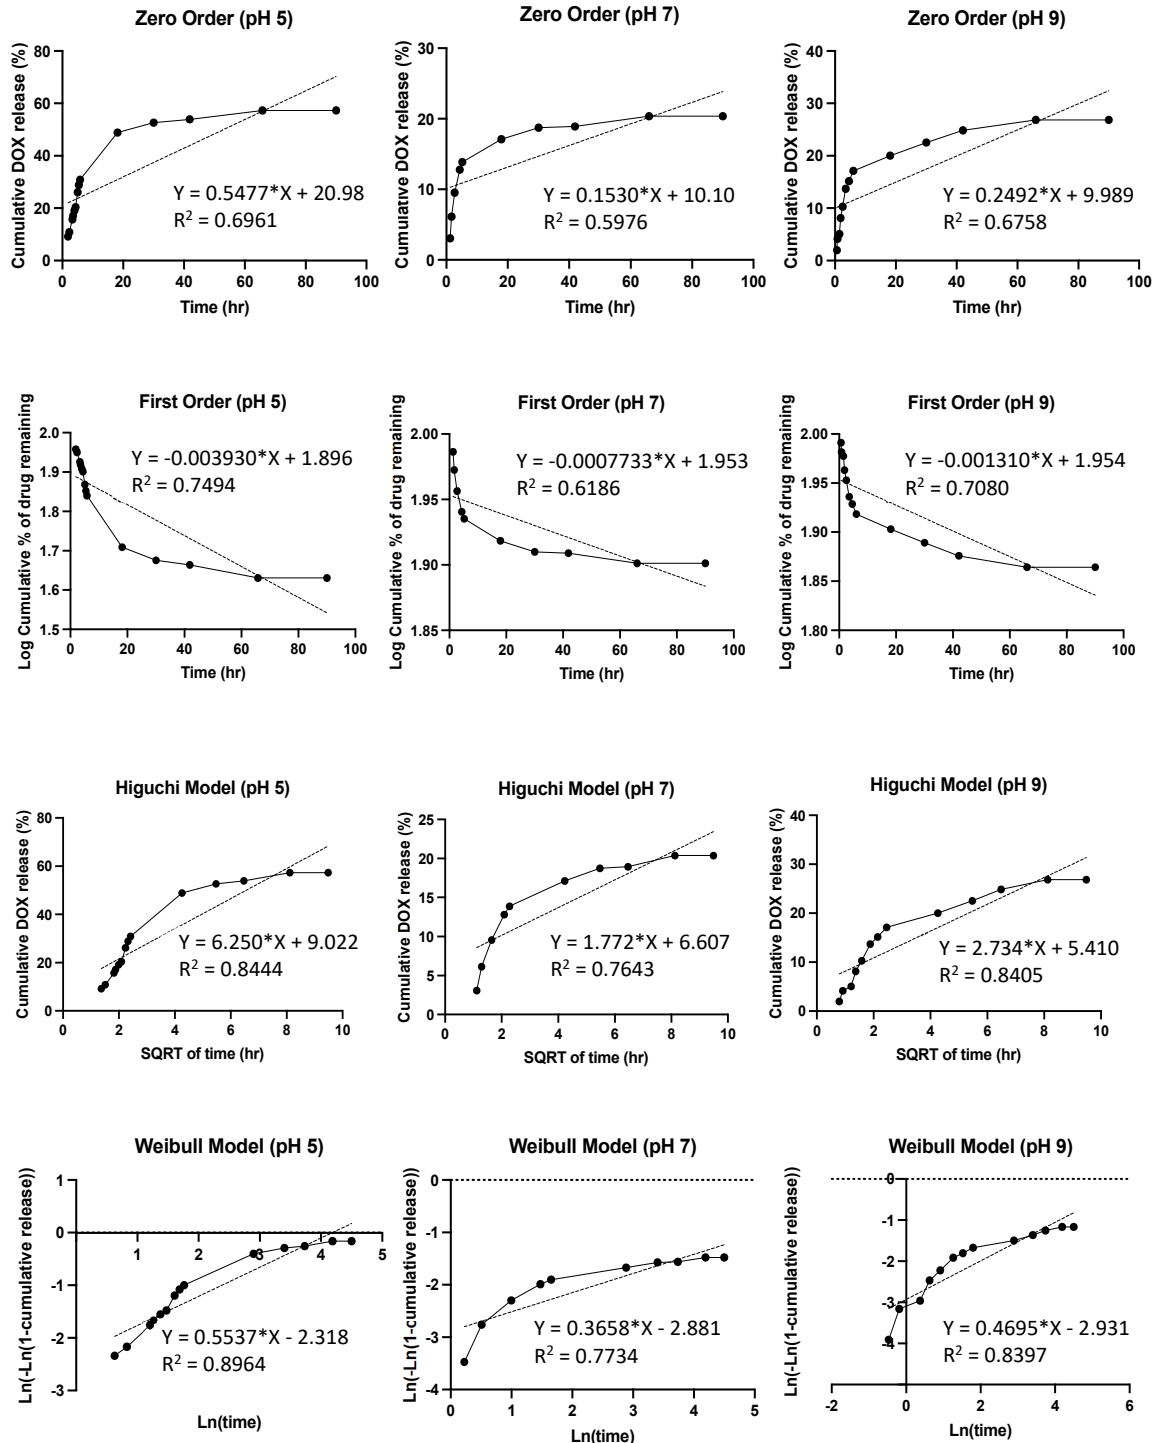

**Figure S13.** Linear regression graphs created using results from Paper 13.<sup>[74]</sup>

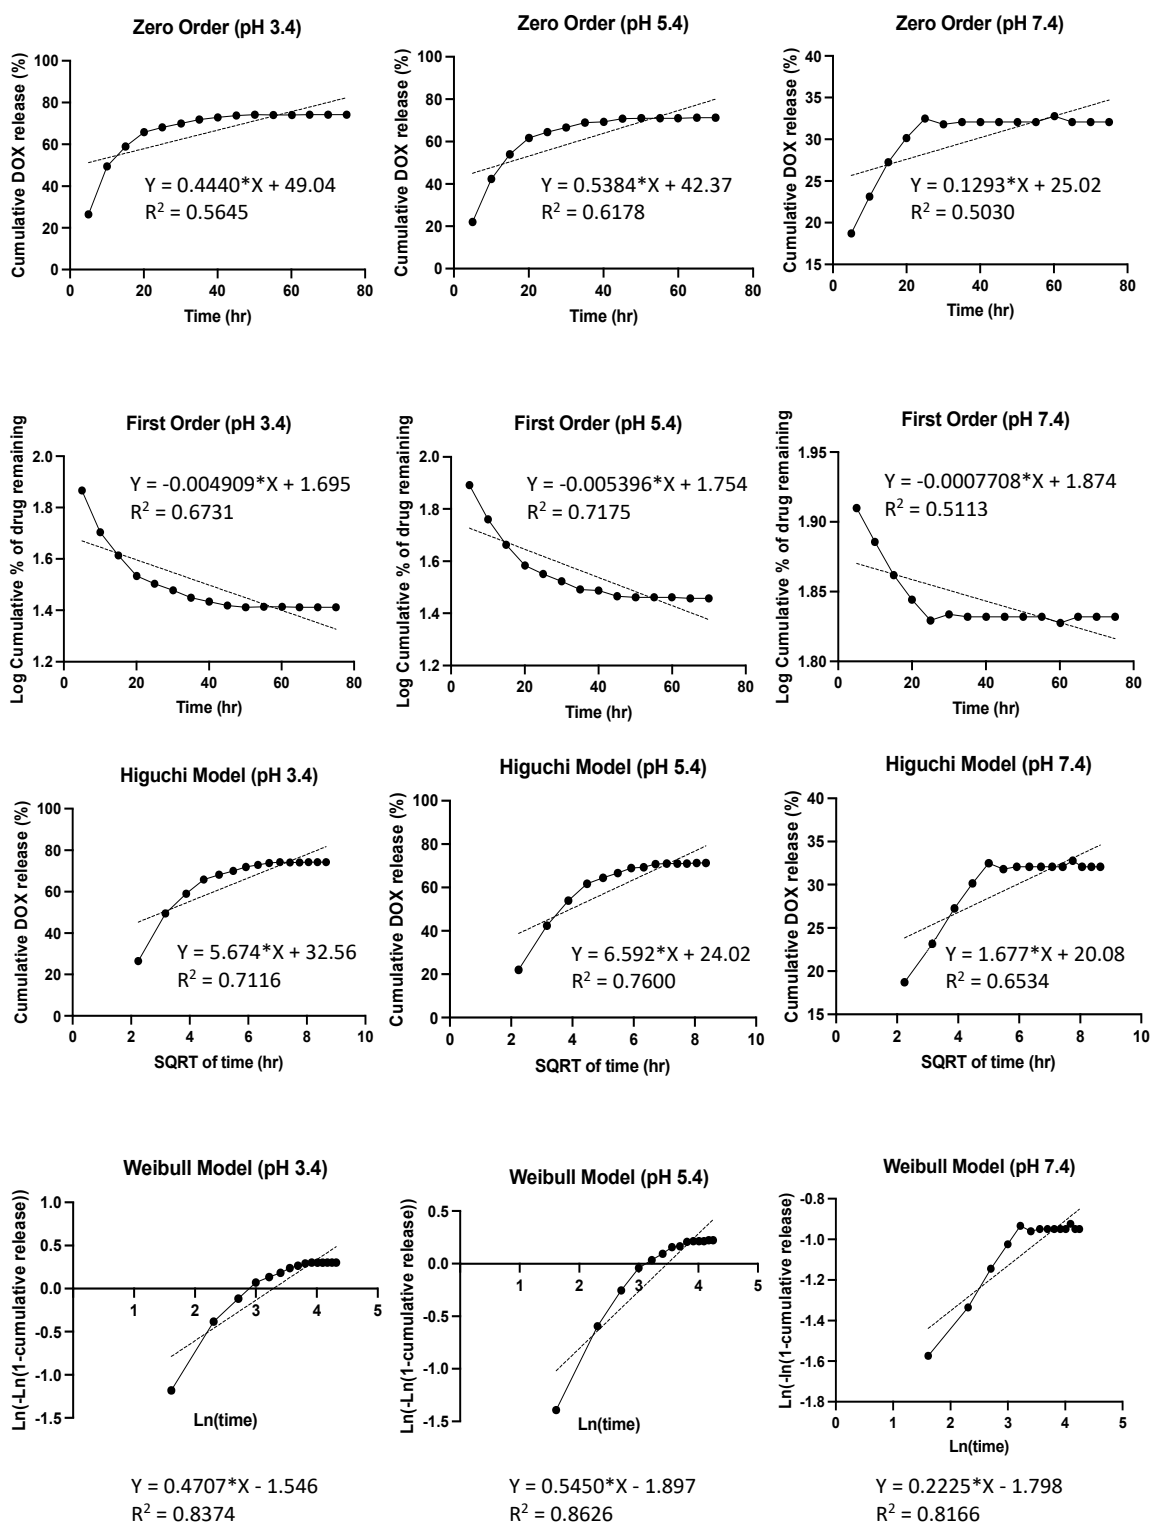

**Figure S14.** Linear regression graphs created using results from Paper 14.<sup>[75]</sup>

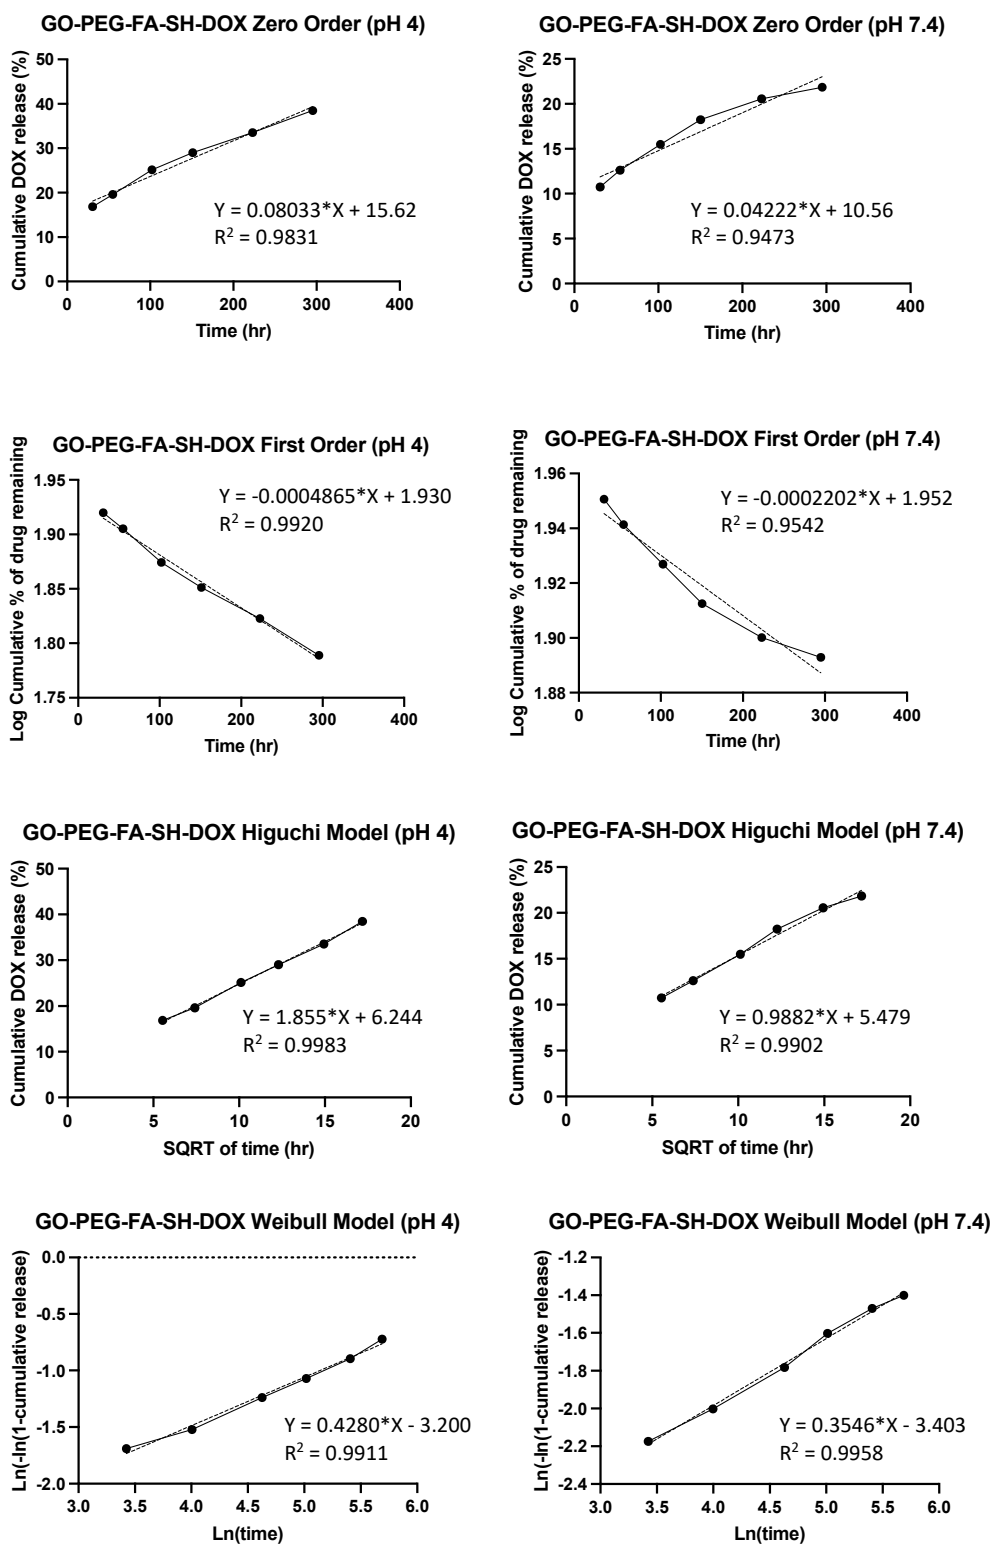

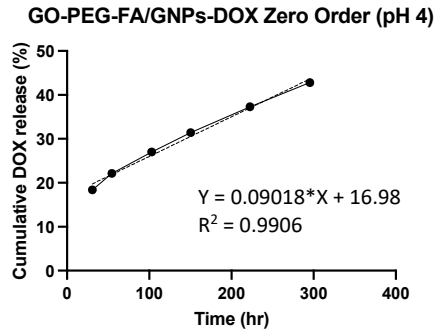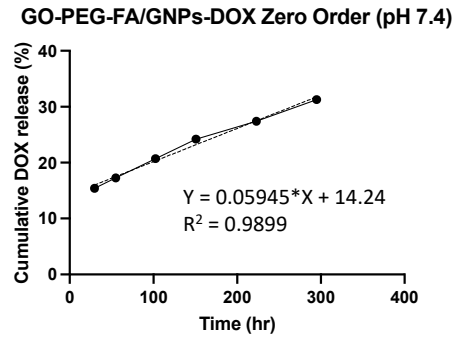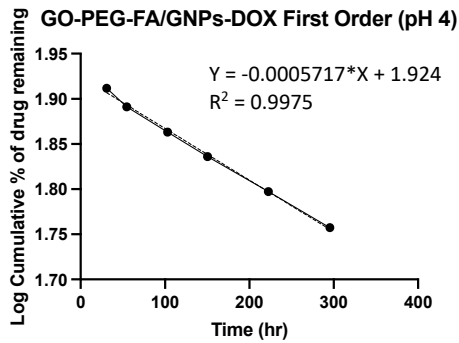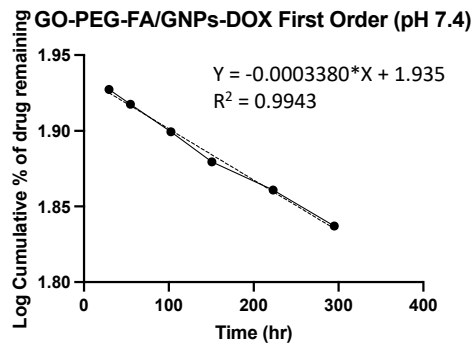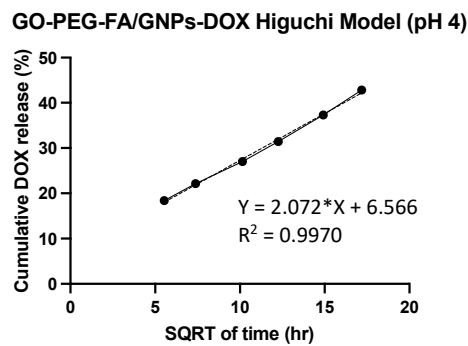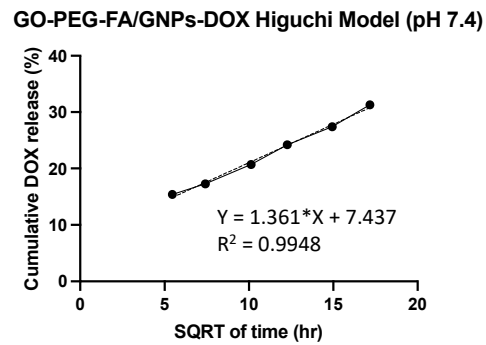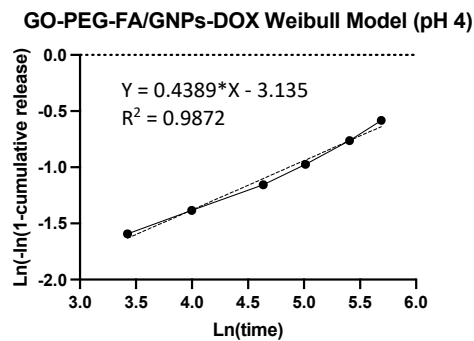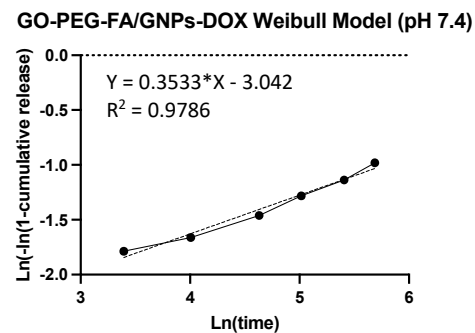

**Figure S15.** Linear regression graphs created using results from Paper 15.<sup>[76]</sup>

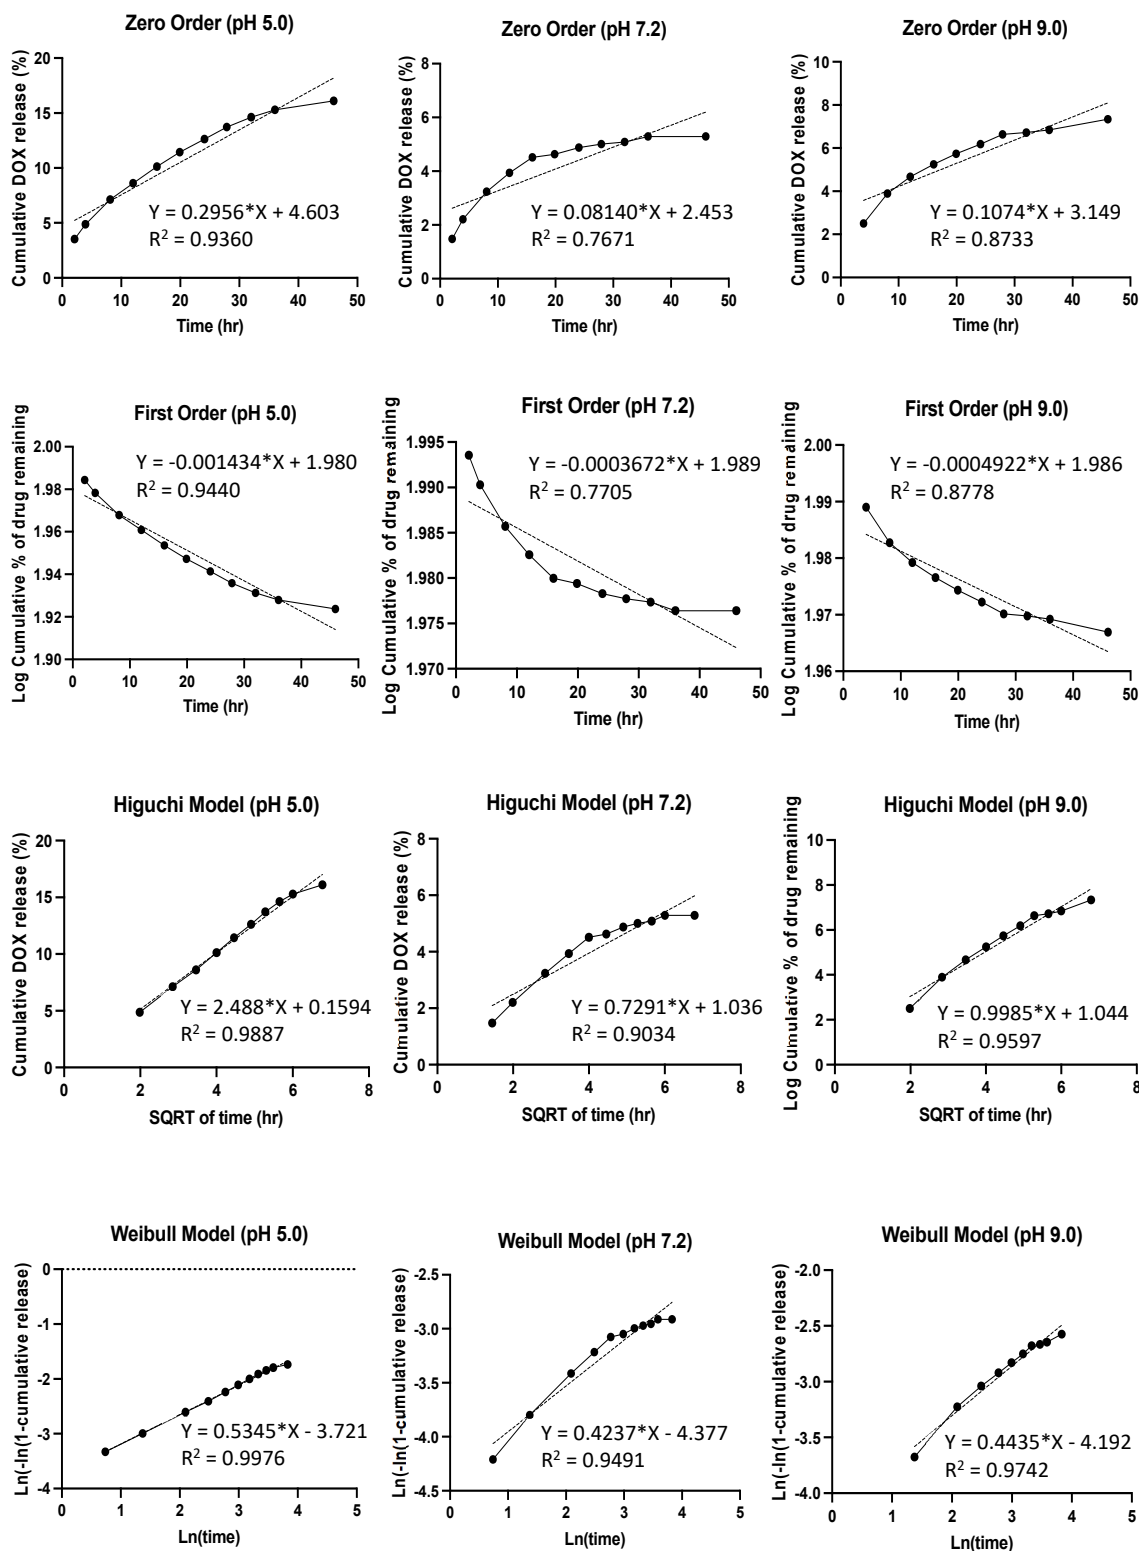

**Figure S16.** Linear regression graphs created using results from Paper 16.<sup>[77]</sup>

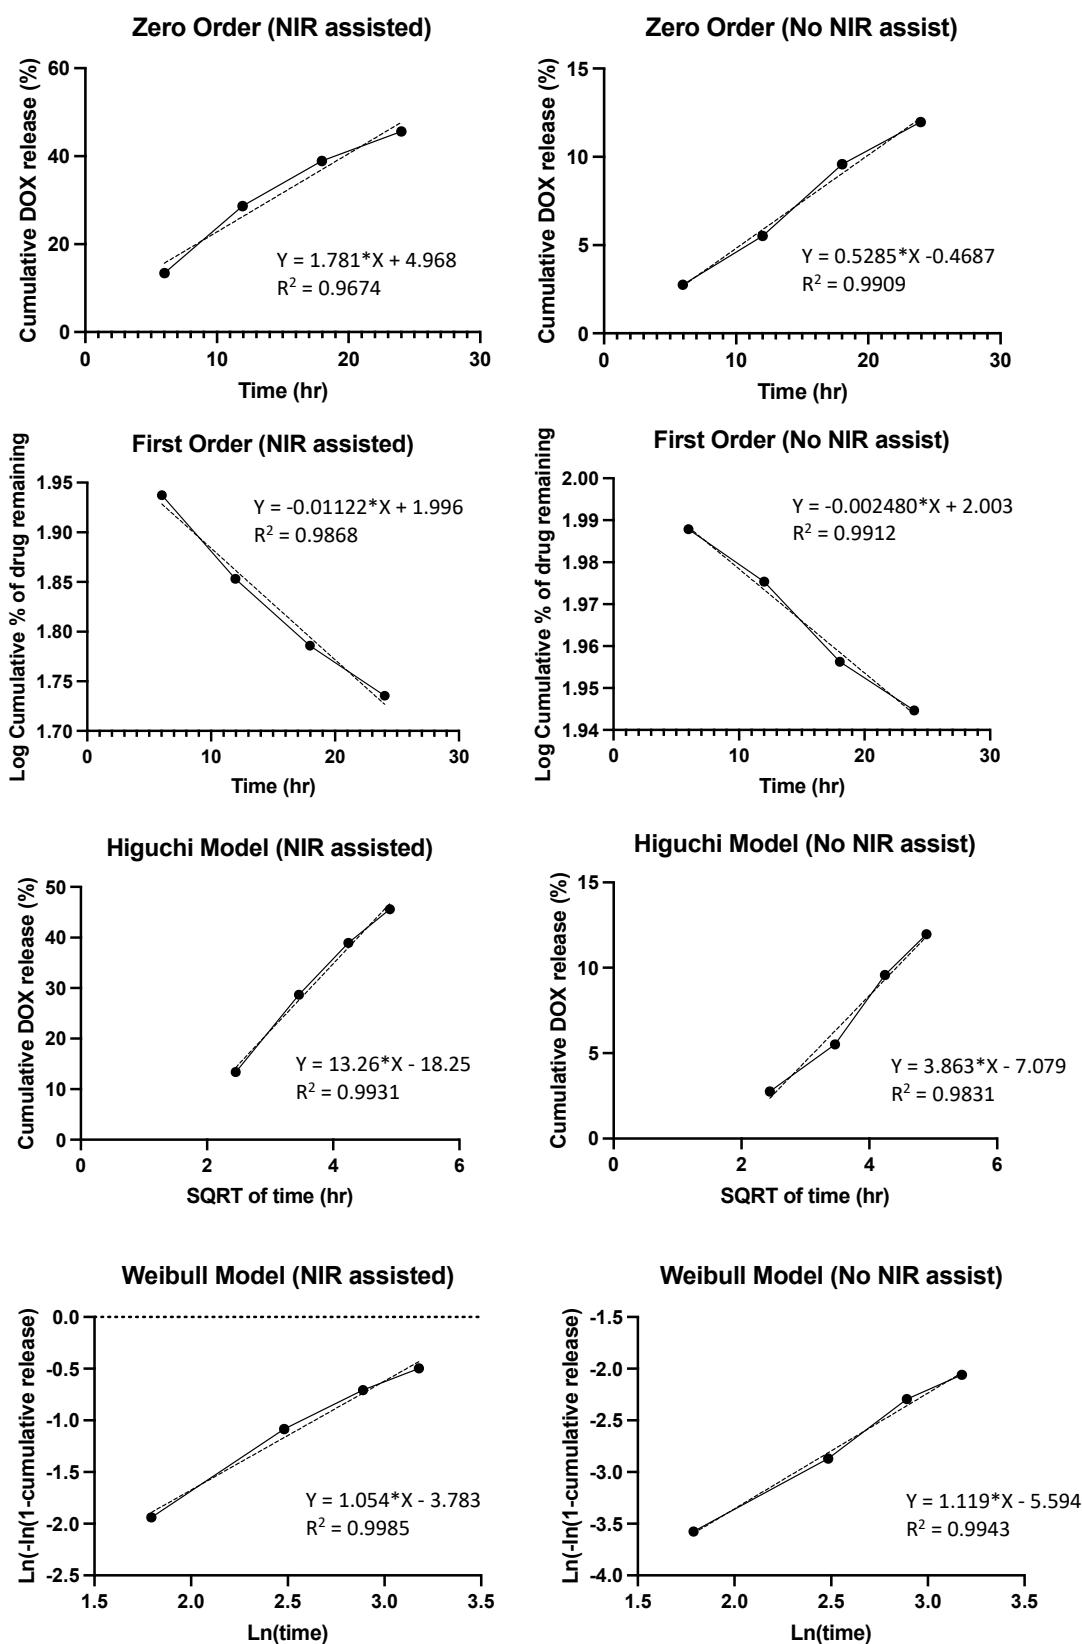

**Figure S17.** Linear regression graphs created using results from Paper 17.<sup>[78]</sup>

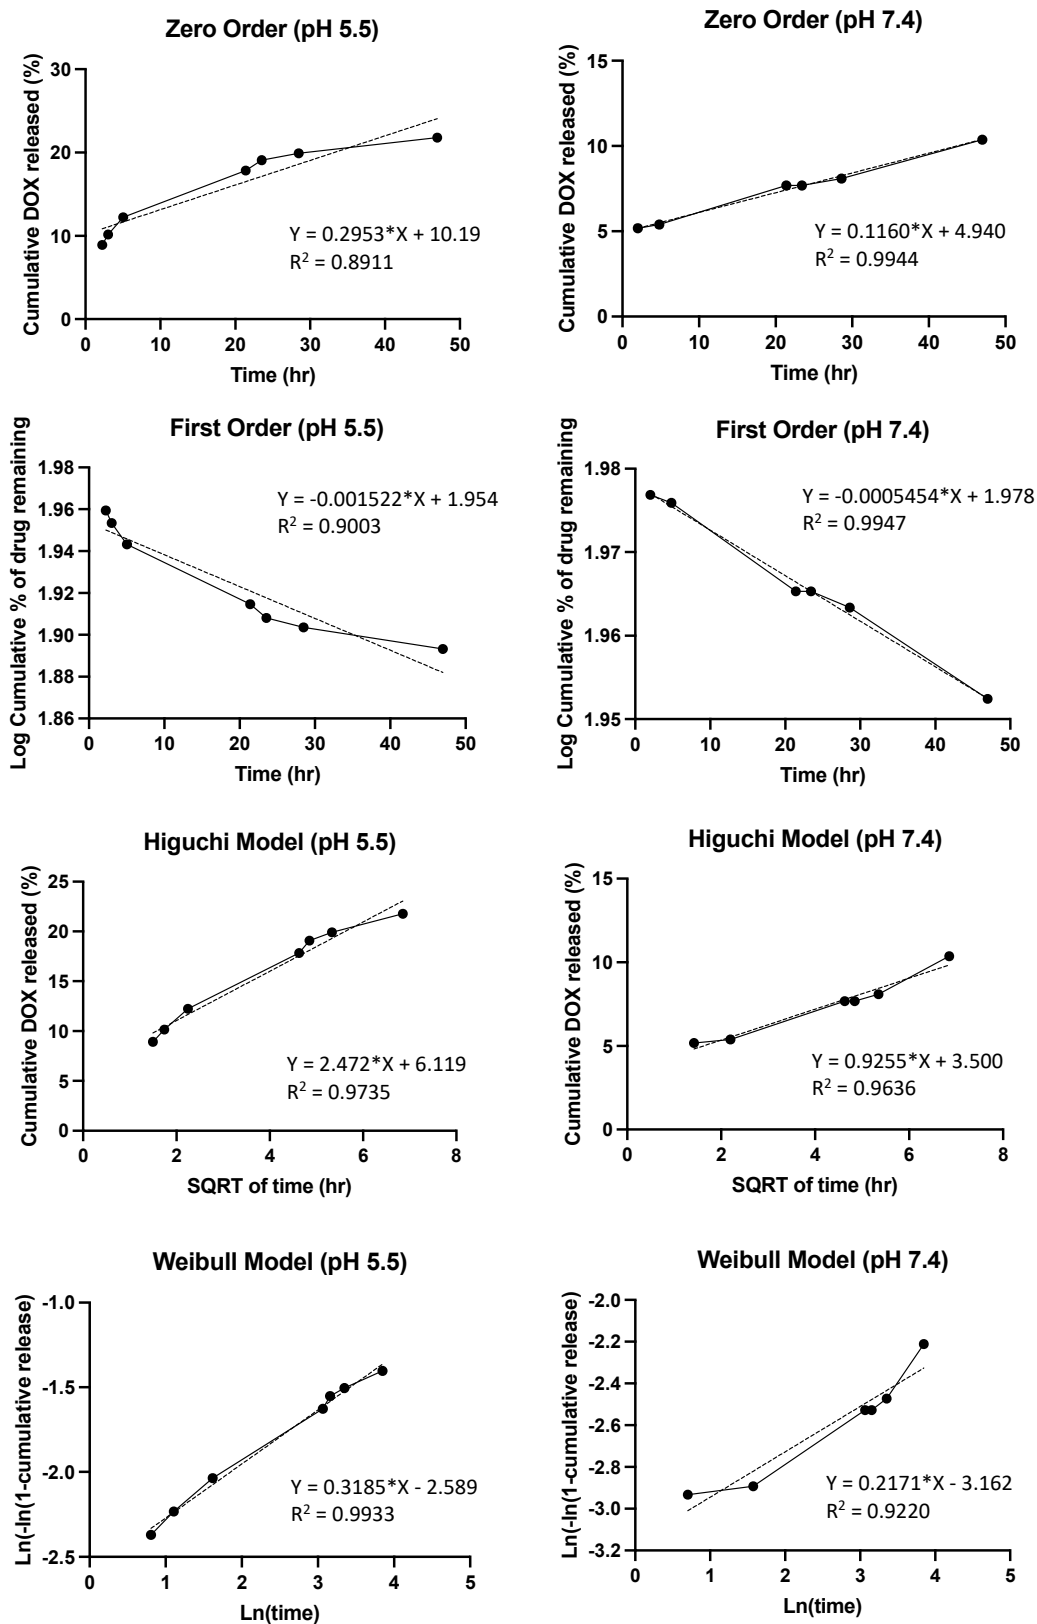

Supplement: s1 [file s1]
